# 1 Long-term patterns of an interconnected core marine 2 microbiota

3  
4  
5  
6 Anders K. Krabberød<sup>1\*</sup>, Ina M. Deutschmann<sup>2</sup>, Marit F. M. Bjorbækmo<sup>1</sup>, Vanessa  
7 Balagué<sup>2</sup>, Caterina R. Giner<sup>2</sup>, Isabel Ferrera<sup>2,3</sup>, Esther Garcés<sup>2</sup>, Ramon Massana<sup>2</sup>, Josep  
8 M. Gasol<sup>2,4</sup>, Ramiro Logares<sup>2,1\*</sup>  
9

10  
11 <sup>1</sup>University of Oslo, Department of Biosciences, Section for Genetics and Evolutionary  
12 Biology (Evogene), Blindernv. 31, N-0316 Oslo, Norway

13  
14 <sup>2</sup> Institute of Marine Sciences (ICM), CSIC, Passeig Marítim de la Barceloneta,  
15 Barcelona, Spain

16  
17 <sup>3</sup> Centro Oceanográfico de Málaga, Instituto Español de Oceanografía, 29640  
18 Fuengirola, Málaga, Spain

19  
20 <sup>4</sup> Centre for Marine Ecosystems Research, School of Sciences, Edith Cowan University,  
21 Joondalup, WA, Australia  
22  
23  
24  
25

## 26 Corresponding authors:

27  
28 \*Anders K. Krabberød, University of Oslo, Department of Biosciences, Section for  
29 Genetics and Evolutionary Biology (Evogene), Blindernv. 31, N-0316 Oslo, Norway  
30 Email: [a.k.krabberod@ibv.uio.no](mailto:a.k.krabberod@ibv.uio.no)  
31

32 \*Ramiro Logares, Institute of Marine Sciences (ICM), CSIC, Passeig Marítim de la  
33 Barceloneta, Barcelona, Spain  
34 Email: [ramiro.logares@icm.csic.es](mailto:ramiro.logares@icm.csic.es)  
35  
36  
37

38 **Running title:** Patterns in a core marine microbiota  
39

40 **Manuscript for:** Microbiome

## 41 **ABSTRACT**

42

### 43 ***Background***

44 Ocean microbes constitute ~70% of the marine biomass, are responsible for ~50% of  
45 the Earth's primary production, and are crucial for global biogeochemical cycles.  
46 Marine microbiotas include core taxa that are usually key for ecosystem function.  
47 Despite their importance, core marine microbes are relatively unknown, which reflects  
48 the lack of consensus on how to identify them. So far, most core microbiotas have been  
49 defined based on species occurrence and abundance. Yet, species interactions are also  
50 important to identify core microbes, as communities include interacting species. Here,  
51 we investigate interconnected bacteria and small protists of the core pelagic microbiota  
52 populating a long-term marine-coastal observatory in the Mediterranean Sea over a  
53 decade.

54

### 55 ***Results***

56 Core microbes were defined as those present in >30% of the monthly samples over 10  
57 years, with the strongest associations. The core microbiota included 259 Operational  
58 Taxonomic Units (OTUs) including 182 bacteria, 77 protists, and 1,411 strong and  
59 mostly positive (~95%) associations. Core bacteria tended to be associated with other  
60 bacteria, while core protists tended to be associated with bacteria. The richness and  
61 abundance of core OTUs varied annually, decreasing in stratified warmer waters and  
62 increasing in colder mixed waters. Most core OTUs had a preference for one season,  
63 mostly winter, which featured subnetworks with the highest connectivity. Groups of  
64 highly associated taxa tended to include protists and bacteria with predominance in the  
65 same season, particularly winter. A group of 13 highly-connected hub-OTUs, with  
66 potentially important ecological roles dominated in winter and spring. Similarly, 18  
67 connector OTUs with a low degree but high centrality were mostly associated with  
68 summer or autumn and may represent transitions between seasonal communities.

69

### 70 ***Conclusions***

71 We found a relatively small and dynamic interconnected core microbiota in a model  
72 temperate marine-coastal site, with potential interactions being more deterministic in  
73 winter than in other seasons. These core microbes would be essential for the functioning  
74 of this ecosystem over the year. Other non-core taxa may also carry out important  
75 functions but would be redundant and non-essential. Our work contributes to the  
76 understanding of the dynamics and potential interactions of core microbes possibly  
77 sustaining ocean ecosystem function.

78

79

80 **Keywords:** bacteria, protists, ocean, time-series, seasonality, networks, associations

81

## 82 BACKGROUND

83 Ecosystems are composed of interacting units embedded in and influenced by their  
84 physicochemical environment. Ecosystem function can be broadly defined as the  
85 biological, geochemical, and physical processes that occur within it. These processes  
86 will likely change or halt if specific organisms or gene-functions are removed, driving  
87 the ecosystem towards a new state or its collapse. It is hypothesized that ecological  
88 redundancy guarantees continuous ecosystem function, as multiple species could carry  
89 out the same or similar function [1]. And while the amount of functional redundancy in  
90 microbial ecosystems is a matter of debate [2, 3] it has also been observed that  
91 microbiotas in comparable habitats tend to share “core” species that are hypothesized  
92 to be fundamental for ecosystem function [4]. These core organisms and the functions  
93 they carry out might not be easily replaced.

94 Identifying the core microbiota is not straightforward as there are different ways  
95 of defining a core depending on the habitats and the questions being addressed [4]. One  
96 often-used approach is to identify species that tend to be recurrently present across  
97 spatiotemporal scales. This definition might not be sufficient, however, since  
98 communities are made up of interacting species [5]. A more appropriate definition of a  
99 core, therefore, needs to incorporate ecological interactions fundamental for the  
100 community in the location under study [4, 5]. This is particularly important in studies  
101 using DNA to investigate microbial communities, as a fraction of the detected taxa  
102 could be dormant, dead, or transient [6-8]. In the interaction-based definition taxa that  
103 do not appear to be interacting are excluded from the core [4].

104 Core microbiotas based on common presence have been widely studied in  
105 terrestrial animals, in particular humans [9] or cattle [10], as well in marine animals, in  
106 particular corals [11, 12] and sponges [13, 14]. Core microbiotas in non-host-associated

107 systems, such as soils or the ocean, have been investigated to a lesser extent. In soils,  
108 for example, a global analysis identified a core group of 241 ubiquitous and dominant  
109 bacterial taxa with more or less invariant abundances and unclear habitat preferences  
110 [15]. In the tropical and subtropical global-ocean, a total of 68 bacteria and 57  
111 picoeukaryotic operational taxonomic units (OTUs) have been identified that could be  
112 part of the core surface microbiota, as they were present in >80% of the globally-  
113 distributed samples [16].

114 Analyses of ocean time-series have also pointed to the existence of core  
115 microbiotas. For example, Gilbert et al. [17] investigated the microbiota of the English  
116 Channel for 6 years and found 12 abundant OTUs that were detected throughout the  
117 entire dataset (72 time-points), totaling ~35% of the sequence abundance. Potentially  
118 core bacterial OTUs were detected in the SPOT time-series (southern California), in a  
119 study covering 10 years of monthly samples in the euphotic zone [18]. These  
120 potentially-core bacterial OTUs were present in >75% of the months, represented ~7%  
121 (25-28 OTUs depending on depth) of the total richness, and had a high (>10%) relative  
122 abundance [18].

123 These studies have provided substantial insights on core marine microbiotas,  
124 although they typically define them in terms of species occurrence or abundance over  
125 spatiotemporal scales, rather than on potential interactions. As in other ecosystems,  
126 microbial interactions are essential for the functioning of the ocean ecosystem, where  
127 they guarantee the transfer of carbon and energy to upper trophic levels, as well as the  
128 recycling of carbon and nutrients [19]. Despite their importance, most microbial  
129 interactions in the ocean remain unknown [20]. A recent literature survey spanning the  
130 last 150 years indicated that we have documented a minor fraction of protist interactions  
131 in the ocean [21] and most likely, the same is true if not worse for bacteria.

132           During the last decade, association networks have been used to bridge this  
133 knowledge gap. Association networks are based on correlations between species'  
134 abundances and they may reflect microbial interactions [22]. Contemporaneous  
135 positive correlations may point to interactions such as symbiosis, or similar niche  
136 preferences, while negative correlations may suggest predation, competition, or  
137 opposite niche preferences [23]. So far, network analyses have produced hypotheses on  
138 microbial interactions at the level of individual species across diverse ecosystems [22,  
139 24, 25], a few of which have been experimentally validated [26]. In addition, networks  
140 can help detect species that have relatively more associations to other species (“hubs”),  
141 or species that connect different subgroups within a network, and which therefore may  
142 have important roles in the ecosystem. Groups of highly associated species in the  
143 network (“modules”) may represent niches [27, 28], and the amount of these modules  
144 may increase with increasing environmental selection [22]. Networks can also produce  
145 ecological insight at the community level, since their architecture can reflect  
146 community processes, such as selection [27].

147           Network analyses have been particularly useful for the investigation of  
148 microbial interactions in the ocean [25, 29]. A surface global-ocean network analysis  
149 of prokaryotes and single-celled eukaryotes indicated that ~72% of the associations  
150 between microbes were positive and that most associations were between single-celled  
151 eukaryotes belonging to different organismal size-fractions [26]. Other studies using  
152 networks have indicated a limited number of associations between marine microbes and  
153 abiotic environmental variables [17, 18, 23, 26, 30-32], suggesting that microbial  
154 interactions have an important role in driving community turnover [32]. Despite the  
155 important insights these studies have provided, most of them share the limitation that

156 they do not disentangle whether microbial associations may represent ecological  
157 interactions or environmental preferences [22].

158       Even though association networks based on long-term species dynamics may  
159 allow a more accurate delineation of core marine microbiotas, few studies have  
160 identified them in this manner. Consequently, we have a limited understanding of the  
161 interconnected set of organisms that may be key for ocean ecosystem function. Here  
162 we identify and investigate the core microbiota occurring in the marine-coastal Blanes  
163 Bay Microbial Observatory (Northwestern Mediterranean Sea) over 10 years. We  
164 delineated the core microbiota stringently, using potential interactions based on species  
165 abundances. We also made an effort to disentangle environmental effects in association  
166 networks by identifying and removing species associations that are a consequence of  
167 shared environmental preference and not interactions between the species [33]. We  
168 analyzed bacteria and protists from the pico- (0.2-3  $\mu\text{m}$ ) and nanoplankton (3-20  $\mu\text{m}$ )  
169 organismal size fractions, which show a strong seasonality in this location [34-36].  
170 Taxa relative abundances were estimated by sequencing the 16S and 18S rRNA-gene  
171 and delineating OTUs as Amplicon Sequence Variants (ASVs). Specifically, we ask:  
172 What taxa constitute the interconnected core microbiota and what are the main patterns  
173 of this assemblage over 10 years? Does the core microbiota feature seasonal sub-groups  
174 of highly associated species? What degree of association do bacteria and microbial  
175 eukaryotes have and do they show comparable connectivity? Can we identify core  
176 OTUs with central positions in the network that could have important ecological roles?

177

## 178 **RESULTS**

179 *Composition and dynamics of the resident microbiota*

180 Based on the data set containing 2,926 OTUs, (1,561 bacteria and 1,365 microbial  
 181 eukaryotes) we first defined the resident OTUs as the bacteria and microbial eukaryotes  
 182 present in >30% of the samples, which equals 36 out of 120 months (not necessarily  
 183 consecutive). This threshold was selected as it includes seasonal OTUs that would be  
 184 present recurrently in at least one season. The residents consisted of 709 OTUs: 354  
 185 Bacteria (~54% relative read abundance) and 355 Eukaryotic OTUs (~46% relative  
 186 read abundance) [**Table 1**, see methods for calculation of relative read abundance]. The  
 187 most abundant resident bacteria OTUs belonged to Oxyphotobacteria (mostly  
 188 *Synechococcus*; ~15% of total relative read abundance), Alphaproteobacteria (mostly  
 189 SAR11 Clade Ia [~9%, and clade II [~4%]), and Gammaproteobacteria (mainly SAR86;  
 190 ~2%). The most abundant resident protist OTUs belonged to Dinophyceae  
 191 (predominantly an unclassified dinoflagellate lineage [~7%], Syndiniales Group I  
 192 Clade 1 [~7%] and *Gyrodinium* [~4%]), Chlorophyta (mostly *Micromonas* [~3%] and  
 193 *Bathycoccus* [~2%]), Ochrophyta (predominantly Mediophyceae [~2%] and  
 194 *Chaetoceros* [~1%]) and Cryptophyceae (mainly a Cryptomonadales lineage [~2%])  
 195 [**Figure 3, Table S1**].

196

197

198 **Table 1.** Description of the datasets

|                                        | OTUs       | OTUs (%)   | Sequence abundance (%)* |
|----------------------------------------|------------|------------|-------------------------|
| <b>All OTUs<sup>1</sup></b>            | 2,926      | 100        | 100                     |
| Bacteria                               | 1,561      | 53.3       | 50.7                    |
| Protists                               | 1,365      | 46.7       | 49.3                    |
| <b>Resident microbiota<sup>2</sup></b> | 709        | 100        | 100 (85)                |
| Bacteria                               | 354        | 49.9       | 53.6                    |
| Protists                               | 355        | 50.1       | 46.4                    |
| <b>Core microbiota<sup>3</sup></b>     | <b>259</b> | <b>100</b> | <b>64.5 (54)</b>        |
| Bacteria                               | 182        | 70.3       | 46.3                    |
| Protists                               | 77         | 29.7       | 18.2                    |
| Picoplankton                           | 109        | 42.1       | 32.4                    |
| Nanoplankton                           | 150        | 57.9       | 32.1                    |
| <i>Protists</i>                        |            |            |                         |
| Heterotroph                            | 5          | 1.9        | 0.3                     |
| Photoautotroph                         | 37         | 14.3       | 11.8                    |

|                                      |     |      |      |
|--------------------------------------|-----|------|------|
| Parasite                             | 21  | 8.1  | 3.5  |
| Mixotroph                            | 3   | 1.2  | 0.7  |
| Symbiont                             | 1   | 0.4  | 0.1  |
| Unknown                              | 11  | 4.3  | 2.0  |
| <i>Bacteria</i>                      |     |      |      |
| Photoautotroph (cyanobacteria)       | 19  | 7.3  | 19.3 |
| Non-photoautotroph <sup>4</sup>      | 163 | 62.5 | 26.8 |
| <i>Seasonal preference core OTUs</i> |     |      |      |
| Winter                               | 156 | 60.2 | 21.8 |
| Spring                               | 24  | 9.3  | 16.4 |
| Summer                               | 44  | 17.0 | 8.2  |
| Autumn                               | 30  | 11.6 | 13.7 |
| No seasonality                       | 5   | 1.9  | 4.5  |
| <i>Seasonal subnetworks</i>          |     |      |      |
| Winter                               | 156 | 60.2 | 21.8 |
| Spring                               | 19  | 7.3  | 13.7 |
| Summer                               | 41  | 15.8 | 6.6  |
| Autumn                               | 26  | 10.0 | 12.9 |

<sup>1</sup> Number of OTUs in the full dataset that were left after quality control and rarefaction, which were present in at least 10% of the samples (i.e. 12 months, not necessarily consecutive).

<sup>2</sup> OTUs present in at least 30% of the samples (i.e. 36 months, not necessarily consecutive) [=Resident microbiota].

<sup>3</sup> OTUs included in the core network (core microbiota) with significant correlations ( $p \& q < 0.001$ ), local similarity scores  $> |0.7|$  and Spearman correlations  $> |0.7|$ , being present in at least 30% of the samples.

<sup>4</sup> Includes non-photoautotrophic lifestyles (i.e., chemoautotrophs, photoheterotrophs, chemoheterotrophs, etc.).

\* In *Italics* the abundances relative to all OTUs are indicated. All other values in normal text indicate abundances relative to OTUs in the resident microbiota.

199  
200  
201  
202  
203  
204  
205  
206  
207

208           The resident microbiota, including both protists and bacteria, showed seasonal  
209 variation over 10 years, with communities from the same season but different years  
210 tending to group (**Figure 1C and D**). The structure of the resident microbiota correlated  
211 to specific environmental variables during winter (nutrients, Total photosynthetic  
212 nanoflagellates [PNF; 2-5 $\mu$ m size], and small PNF [2 $\mu$ m]), spring (Total Chlorophyll  
213 a [Chla]), summer (daylength, temperature, Secchi disk depth and, the cell abundances  
214 of *Synechococcus*, Heterotrophic prokaryotes [HP] and Heterotrophic nanoflagellates  
215 [HNF, 2-5 $\mu$ m]) and autumn (salinity) [**Figure 1C**]. The environmental variables most  
216 relevant for explaining the variance of the resident microbiota were determined by  
217 stepwise model selection and distance-based redundancy analyses (dbRDA) [**Figure**  
218 **1D**], leading to a dbRDA constrained and unconstrained variation of 41% and 59%  
219 respectively (**Figure 1D**). The selected variables were predominantly aligned with the  
220 axis summer (daylength, temperature, and the cell abundance of *Synechococcus* and  
221 HP) - winter (SiO<sub>2</sub>, small PNF [**Figure 1D**]. This dbRDA axis had the highest  
222 eigenvalue, explaining ~55% of the constrained variation (**Figure 1D**). Even though



223 the measured environmental variables did not explain the majority of the variation of  
224 the resident microbiota, they could account for a substantial fraction. This was further  
225 supported by Adonis analyses, which indicated that the measured environmental  
226 variables could explain ~45% of the resident microbiota variance, with temperature and  
227 daylength having a predominant role by accounting for 30% of this variance (15%  
228 each).

229 We then investigated whether temperature and daylength could determine the  
230 main niches. We found that ~70% and ~68% of the OTUs in the resident microbiota  
231 had niche preferences associated with temperature or daylength respectively (**Figure**  
232 **1E-F**; Note that several OTUs preferring Spring or Autumn are not expected to be  
233 detected with this approach, as their preferred temperature or daylength may not differ  
234 significantly from the randomized mean). In total, 371 OTUs from the resident  
235 microbiota had both a temperature and a daylength niche preference that departed  
236 significantly from the randomization mean (**Figure 1E-F**). These 371 OTUs  
237 represented ~52% of all OTUs in the resident microbiota, corresponding to ~90% of  
238 the sequence abundance. In particular, 248 OTUs had a weighted mean for both  
239 temperature and daylength below the randomization mean (corresponding to  
240 winter/autumn), while 116 OTUs had a weighted mean above the randomization mean  
241 for both variables (corresponding to summer/spring). Interestingly, 7 OTUs displayed  
242 a weighted mean above and below the randomized mean for temperature and daylength  
243 respectively (corresponding to autumn or spring).

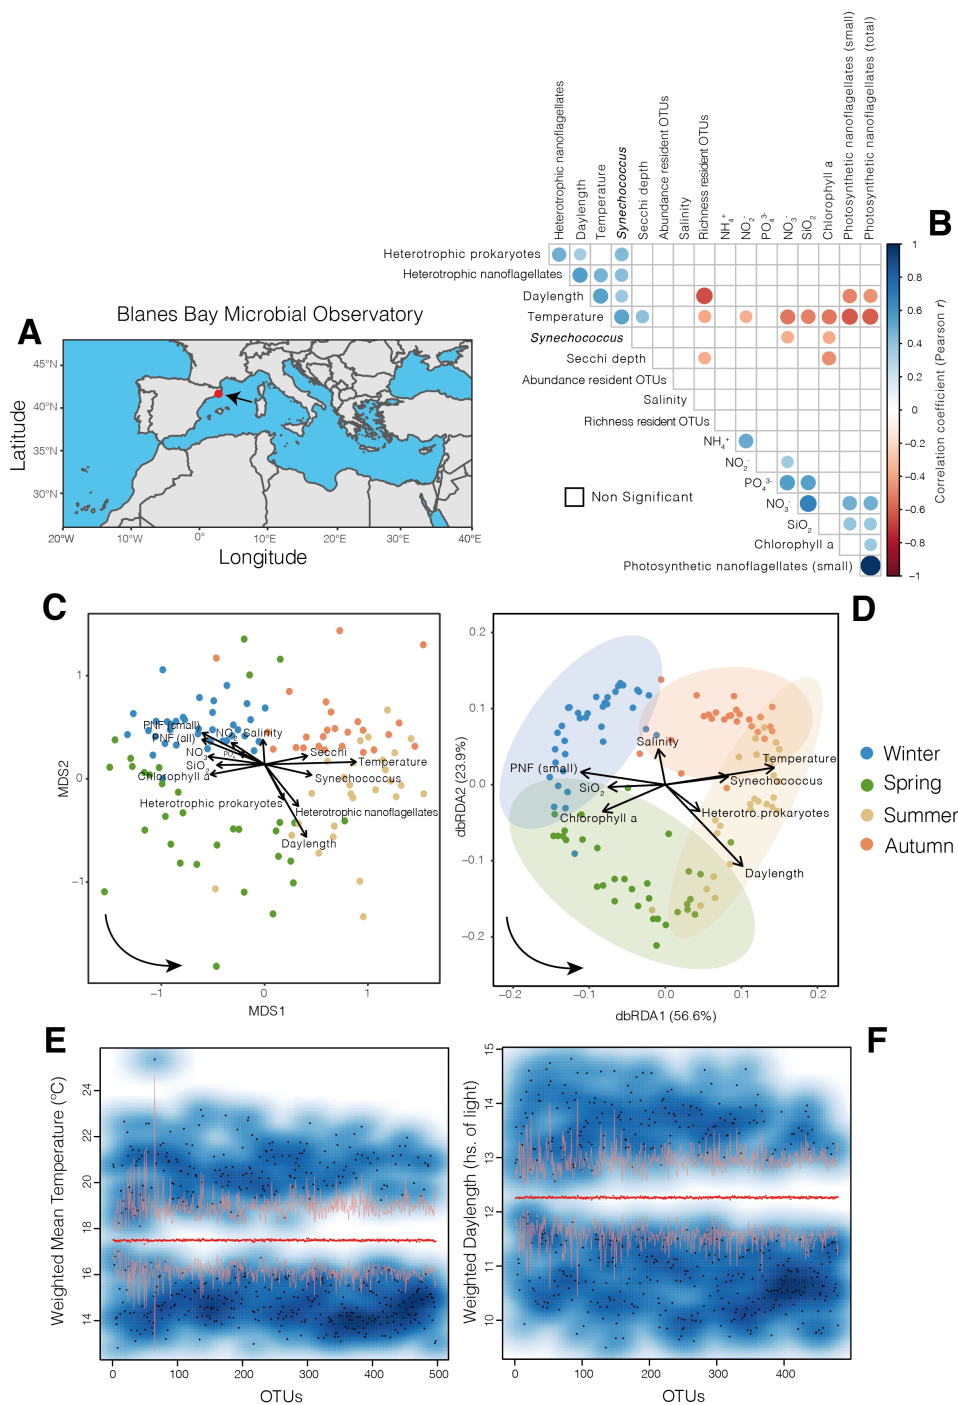

244

245 **Figure 1. The Blanes Bay Microbial Observatory and the variation of its resident**  
 246 **microbiota and measured environmental variables over ten years. A)** Location of the Blanes  
 247 Bay Microbial Observatory. **B)** All possible correlations between the measured environmental  
 248 variables including the richness and abundance of resident OTUs (NB: only 709 resident OTUs  
 249 are considered, see **Table1**). Only significant Pearson correlation coefficients are shown  
 250 ( $p < 0.01$ ). The  $p$ -values were corrected for multiple inference (Holm's method). **C)** Unconstrained

251 ordination (NMDS based on Bray Curtis dissimilarities) of communities including resident OTUs  
252 only, to which environmental variables were fitted. Only variables with a significant fit are shown  
253 ( $P < 0.05$ ). Arrows indicate the direction of the gradient and their length represents the strength  
254 of the correlation between resident OTUs and a particular environmental variable. The color of  
255 the samples (circles) indicates the season to which they belong. The bottom-left arrow indicates  
256 the direction of the seasonal change. PNF = photosynthetic nanoflagellates. **D**) Constrained  
257 ordination (Distance-based redundancy analyses, dbRDA, using Bray Curtis dissimilarities)  
258 including only the most relevant variables after stepwise model selection using permutation tests.  
259 Each axis (i.e., dbRDA1 and dbRDA2) indicates the amount of variance it explains according to  
260 the associated eigenvalues. The color of the samples (circles) indicates the season to which they  
261 belong. Arrows indicate the direction of the gradient and their length represents the strength of  
262 the correlation between resident OTUs and a particular environmental variable. The bottom-left  
263 arrow indicates the direction of the seasonal change. E-F) Resident OTUs displaying different  
264 niche preferences (blueish areas) in terms of the two most important abiotic variables:  
265 Temperature E) and Daylength F). The red dots indicate the randomization mean, and the orange  
266 curves represent the confidence limits. Black dots indicate individual OTUs for which temperature  
267 or daylength preferences are significantly ( $p < 0.05$ ) higher or lower than a random distribution  
268 over 10 years. At least two assemblages with different niches become evident: one preferring  
269 higher temperature and longer days (summer/spring), and another one preferring lower  
270 temperature and shorter days (winter/autumn). Note that several OTUs associated to Spring or  
271 Autumn are not expected to be detected with this approach, as their preferred temperature or  
272 daylength may not differ significantly from the randomized mean.

273

274 *Core network*

275 To determine the core microbiota that incorporates possible interactions, we  
276 constructed an association network based on the resident OTUs and removed all OTUs  
277 that were not involved in strong and significant associations with any other OTUs.  
278 Specifically, we kept only the associations (edges in the network) with Local similarity  
279 score  $|LS| > 0.7$ , a false discovery rate adjusted p-value  $< 0.001$  and Spearman  $|r| > 0.7$ .  
280 In addition, we removed all associations that seemed to be caused by environmental  
281 preferences of OTUs (see Methods). The core network consisted of 1,411 significant  
282 and strong correlations (**Figure 2A**) and was substantially smaller than the network  
283 based on the resident OTUs without stringent cut-offs (**Supp. Figure 1A**, removed  
284 edges in **Supp. Figure 1B**). The core network includes only the strongest microbial  
285 associations that are inferred during a decade and, according to our definition,  
286 determines the core microbiota. The associations in the core microbiota may represent  
287 proxies for species interactions since steps have been taken to remove associations that  
288 are driven by environmental factors.

289 In the core network, most associations were positive (~95%), pointing to the  
290 dominance of co-existence or symbiotic associations (**Table 2, Figure 2A**). The core  
291 network had “small world” properties [37], with a small average path length (i.e.  
292 number of nodes between any pair of nodes through the shortest path) and a relatively  
293 high clustering coefficient, showing that nodes tend to be connected to other nodes,  
294 forming tightly knit groups, more than what it would be expected by chance (**Table 3**).  
295 Since node degree was not correlated with OTU abundance (**Supp. Figure 2**), the  
296 associations between OTUs are not caused by a high sequence abundance alone, as the  
297 most abundant OTUs did not tend to be the most connected.

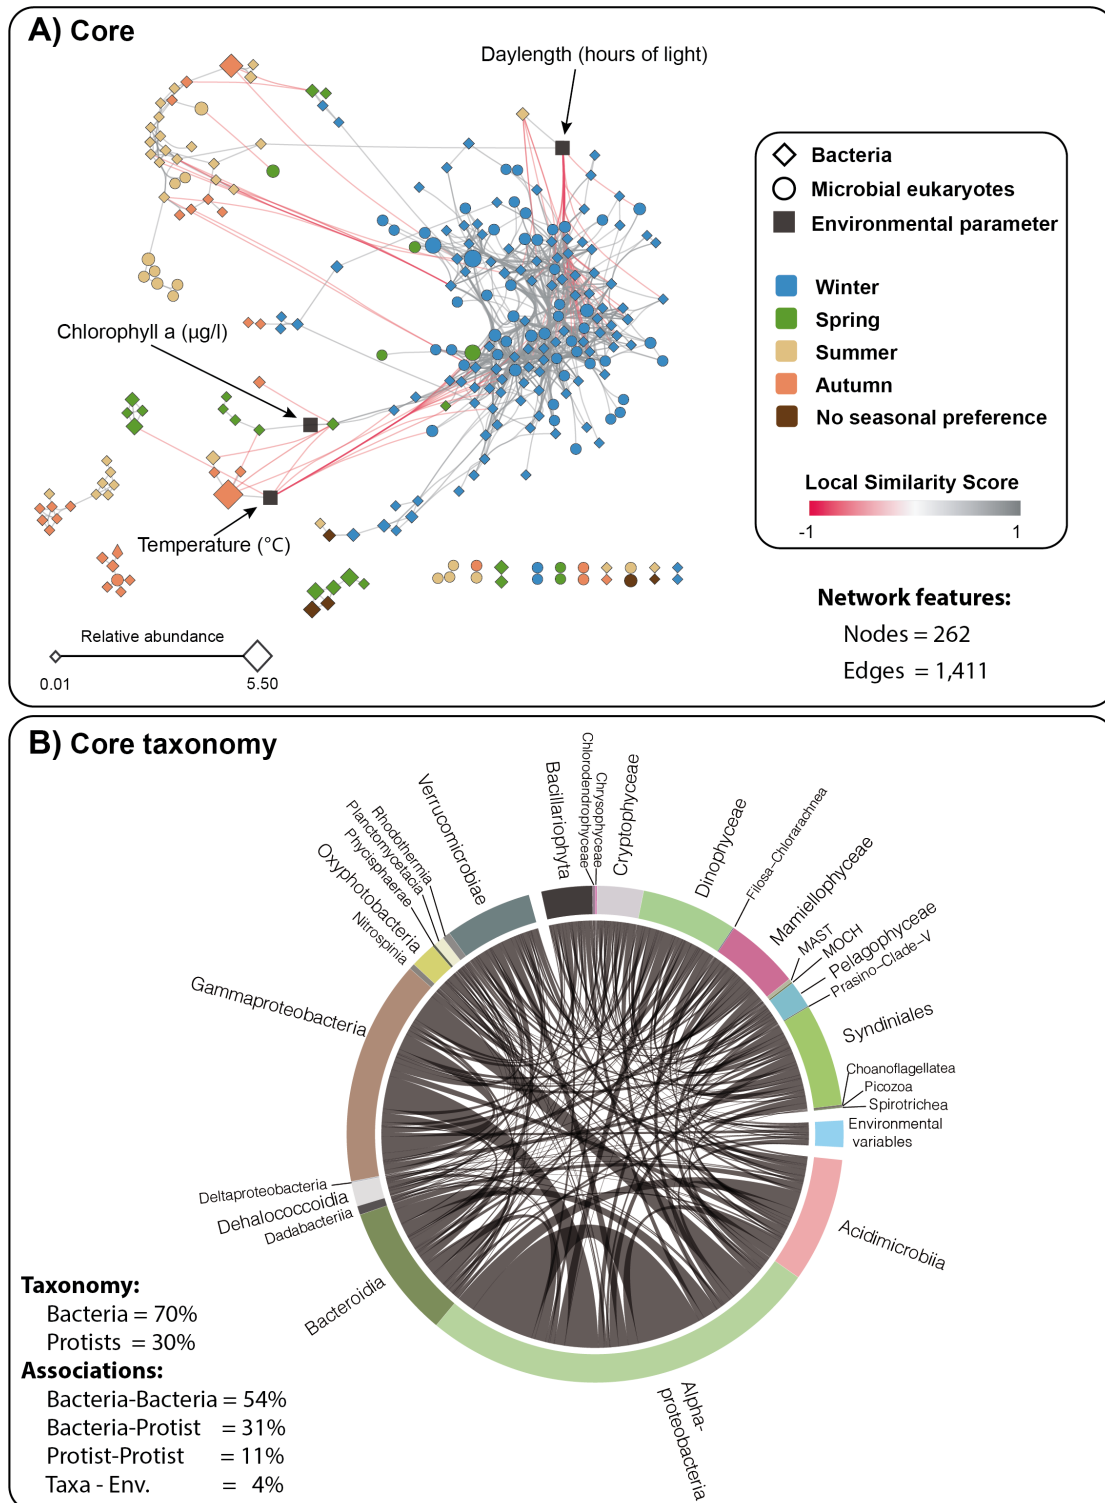

298

299

300 **Figure 2. Core microbiota resulting from 10 years of monthly pico- and nanoplankton**  
 301 **relative abundances. A) Core network including bacteria and microbial eukaryotic OTUs that**  
 302 **occur  $\geq 30\%$  of the time during the studied decade (i.e. resident microbiota), with highly**  
 303 **significant and strong associations ( $P < 0.001$  and  $Q < 0.001$ , absolute local similarity score  $|LS| >$**

304 0.7, Spearman correlation  $|\rho|>0.7$ ), where detected environmentally-driven edges were  
305 removed. The color of the edges (links) indicates whether the association is positive (grey) or  
306 negative (red). The shape of nodes indicates bacteria (rhomboid) or microbial eukaryotes (circle),  
307 and the color of nodes represents species seasonal preferences, determined using the indicator  
308 value (*indval*,  $p<0.05$ ). Node size indicates OTU relative abundance. B) Core network as a Circos  
309 plot, indicating the high-rank taxonomy of the core OTUs. Since 95% of the associations are  
310 positive (see Table 2), we do not indicate whether an edge is positive or negative.

311

312 The core network displayed a winter cluster, while no clear clusters could be  
313 defined for the other seasons (**Figure 2A**). Of the 15 environmental variables analyzed,  
314 only 3 were found to be significantly correlated with core OTUs: *daylength*, showing  
315 strong correlations with 33 OTUs, *temperature*, correlated with 14 OTUs, and  
316 *Chlorophyll a*, correlated with 1 OTU (**Figure 2A**). Therefore, the analysis of the core  
317 network also points to the importance of temperature and daylength in the decade-long  
318 seasonal dynamics of the studied microbial ecosystem. It is also coherent with the  
319 Adonis and ordination analyses (**Figure 1C-B**). However, the associations between  
320 these environmental parameters with taxa represented only 4% of all the associations  
321 (**Figure 2B**).

322 **Table 2.** Core associations. See **Figure 2**.

323

|                           | Association #<br>(edges) | Co-occurrences<br>(positive) | Co-exclusions<br>(negative) |
|---------------------------|--------------------------|------------------------------|-----------------------------|
| All                       | 1,411                    | 1,341 (95.0%)                | 70 (5.0%)                   |
| Within Picoplankton       | 378                      | 353 (93.3%)                  | 25 (6.6%)                   |
| Within Nanoplankton       | 791                      | 748 (94.6%)                  | 43 (5.4%)                   |
| Picoplankton-Nanoplankton | 242                      | 240 (99.2%)                  | 2 (0.8%)                    |

324

325 Of the 709 OTUs from the resident microbiota (**Figure 3**), only 259 OTUs  
326 (35%) were left in the core network (182 bacteria (~70%) and 77 microbial eukaryotic  
327 OTUs (~30%); **Table 1, Figure 2**). The monthly taxonomic composition of the resident  
328 microbiota differed from that of the core (**Figure 3**). The core OTUs accounted for  
329 ~64% of the relative read abundance of the resident microbiota (**Table 1**). The core

330 OTUs had annual variation in terms of richness and abundance over the 10 years for  
 331 both the pico- and nanoplankton, with microbial eukaryotes decreasing markedly in  
 332 OTU richness and relative read abundance in the warmer seasons, and increasing during  
 333 colder periods (**Figure 3**).

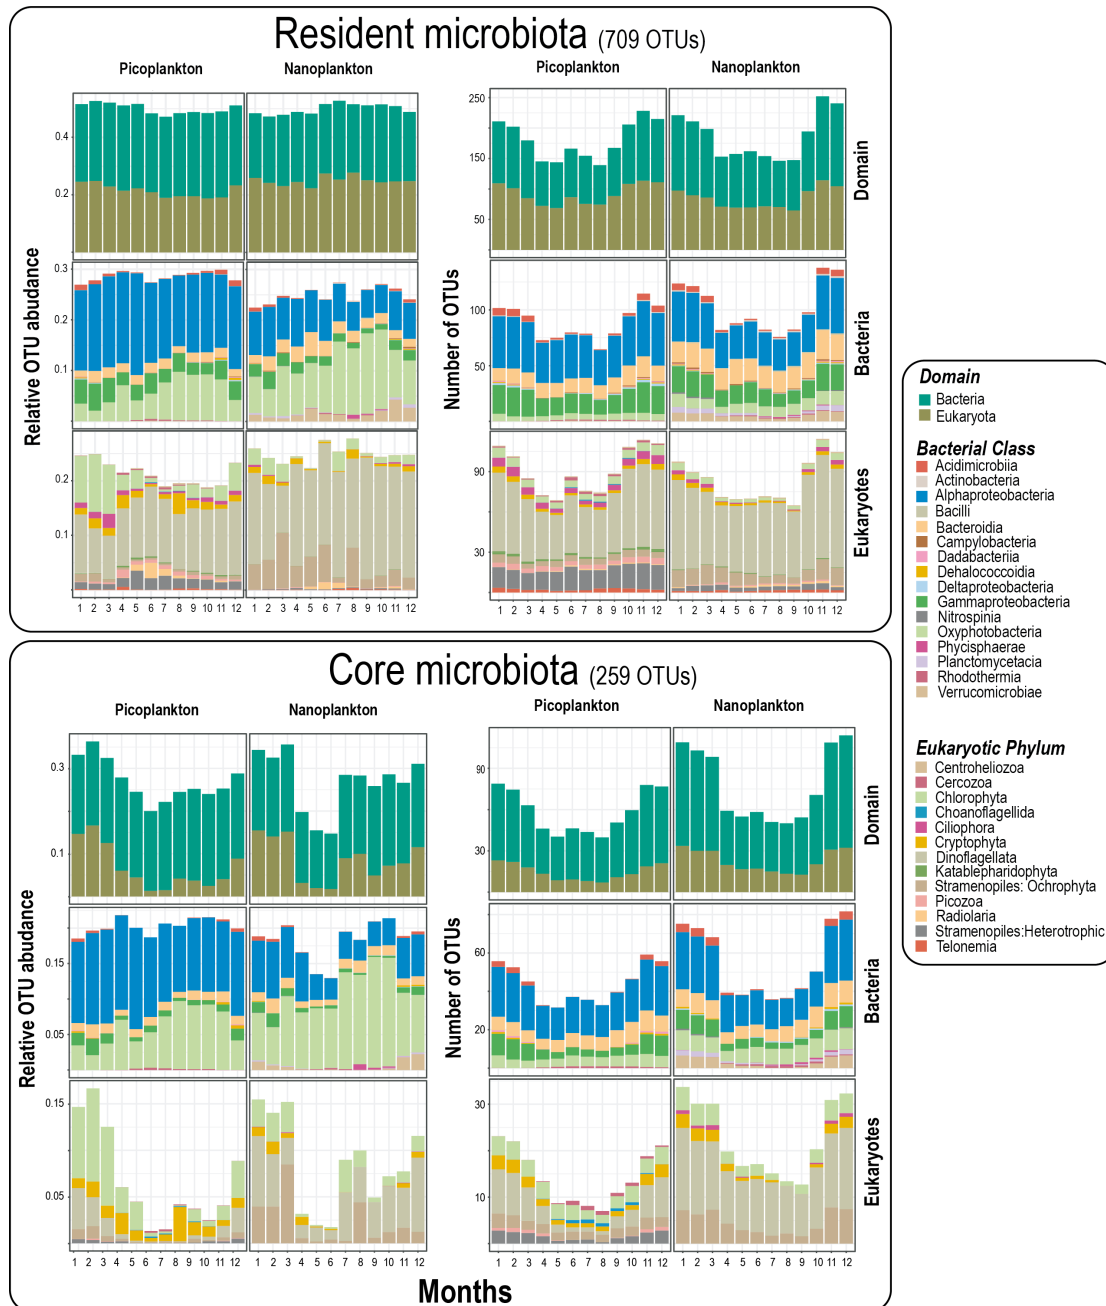

334

335

336 **Figure 3. The monthly variation in the resident and core microbiotas over 10 years. Upper**

337 *panels*: The resident microbiota is defined as those eukaryotes and bacteria that occur in at least

338 30% of the samples over 10 years. The relative OTU abundance (left panel) and number of OTUs  
339 (right panel) for different domains and taxonomic levels in the resident microbiota are shown.  
340 Note that the relative abundance of Bacteria vs. Eukaryotes does not necessarily reflect  
341 organismal abundances on the sampling site, but the amplicon relative abundance after PCR.  
342 Relative abundances were calculated for each year and aggregated over the corresponding  
343 months along the 10 years for the resident microbiota, then split into size fractions (NB: relative  
344 abundance for both domains and size fraction sums up to 1 for each month across ten years).  
345 *Lower panels:* Core microbiota over 10 years. The relative abundances of core OTUs reflect the  
346 remaining proportions after removing all the OTUs that were not strongly associated when  
347 building networks. Relative OTU abundance (left panel) and number of OTUs (right panel) for  
348 different domains and taxonomic levels among the core OTUs.

349

350 The most abundant bacteria (**Figure 3; Supplementary Table S2**) among the  
351 core OTUs were Oxyphotobacteria (mostly *Synechococcus*), total abundance ~14% of  
352 the resident microbiota, followed by Alphaproteobacteria, with SAR11 clades Ia and II  
353 representing ~9% and ~2% respectively. The most abundant microbial eukaryotic  
354 groups were *Micromonas*, *Bathycoccus*, Dinophyceae, and Cryptomonadales (each  
355 ~2%) [**Figure 3; Supplementary Table S3**]. In terms of diversity and abundance,  
356 bacterial non-phototrophs (including chemoautotrophs, photoheterotrophs,  
357 chemoheterotrophs) were the most prevalent in the core microbiota, representing ~62%  
358 of the OTUs and a quarter of the total relative read abundance (**Table 1**). In turn,  
359 protistan heterotrophs represented a minor fraction of the diversity and relative  
360 abundance (**Table 1**). Bacteria photoautotrophs were relatively more abundant than  
361 their protistan counterparts but less diverse (**Table 1**). Protistan parasites represented



362 ~8% of the OTUs and ~3% of the abundance, while the remaining protistan lifestyles  
363 had a minor relevance in the core microbiota (**Table 1**).

364

#### 365 *Intra- and cross-domain core associations*

366 Bacteria tended to be associated with other bacteria (**Table 3 & 4; Figure 2B**), with  
367 Bacteria-Bacteria associations making up ~54% of all associations, while Protist-Protist  
368 associations accounted for 11% (**Table 4**). The connectivity of the bacterial  
369 subnetworks was higher (mean degree ~10) than the protist counterparts (mean degree  
370 ~6), regardless of whether these networks included exclusively bacteria, protists, or  
371 both (**Table 3**).

372 In particular, there was a substantial number of associations between Alpha-  
373 and Gammaproteobacteria, between Alphaproteobacteria and Acidimicrobia as well as  
374 among Alphaproteobacteria OTUs (**Figure 2B**). Eukaryotic OTUs did not show a  
375 similar trend with associations between OTUs of the same taxonomic ranks (**Figure**  
376 **2B**). In terms of cross-domain associations, Alphaproteobacteria OTUs had several  
377 associations with most major protistan groups (i.e. dinoflagellates, diatoms,  
378 cryptophytes, Mamiellophyceae, and Syndiniales) [**Figure 2B**].

379

#### 380 *Core associations within the pico- and within the nanoplankton*

381 While the pico- and nano-size fractions indicate different lifestyles in bacteria (free-  
382 living or particle-attached), they indicate different cell sizes in protists, and this could  
383 be reflected in association networks. Nanoplankton sub-networks were larger and more  
384 connected than picoplankton counterparts (**Figure 4, Table 3**). This pattern was  
385 observed in both sub-networks considering associations from the same or both size  
386 fractions (**Table 3**). Nanoplankton sub-networks had a higher average degree (~10)

387 than picoplankton sub-networks (~7; Wilcoxon  $p < 0.05$ ), while not differing much in  
 388 other network statistics (**Table 3**). Most associations in the pico- and nanoplankton  
 389 were positive (>93%), while the associations between OTUs from different size  
 390 fractions represented only ~17% of the total, being ~99% positive (**Table 2**).

391 In the pico- or nanoplankton sub-networks that include OTUs from the same  
 392 size fraction, the number of bacterial core OTUs was higher than the protistan  
 393 counterparts (103 bacterial vs. 47 protistan OTUs in the nanoplankton, and 79 bacterial  
 394 vs. 30 protistan OTUs in the picoplankton) (**Figure 4, Table 3**). Still, core OTUs in  
 395 both the pico- and nanoplankton had comparable sequence abundances: ~27% of the  
 396 resident microbiota in each size fraction. Within the picoplankton, 64% of the  
 397 associations were between bacteria, 8% between eukaryotes, and 25% between  
 398 eukaryotes and bacteria (**Table 4**). In turn, in the nanoplankton, 50% of the edges were  
 399 between bacteria, 14% between eukaryotes, and 31% between eukaryotes and bacteria  
 400 (**Table 4**). Overall, the BBMO pico- and nanoplankton sub-networks differed in size,  
 401 connectivity, and taxonomic composition, while they were similar in terms of positive  
 402 connections and relative sequence abundance.

403

404 **Table 3. Core network and sub-networks statistics.**

| Network                        | Nodes<br>(#OTUs) | Edges   | Di. | De.  | Average<br>degree | Average<br>path<br>length | Average<br>clustering<br>coefficient | Largest<br>clique<br>(#) | Mod. |
|--------------------------------|------------------|---------|-----|------|-------------------|---------------------------|--------------------------------------|--------------------------|------|
| Core network                   | 262 (259)        | 1,411   | 11  | 0.04 | 10.7              | 3.45                      | 0.52                                 | 13 (4)                   | 0.19 |
| Random core network            | 262              | 1,411   | 5   | 0.04 | 10.7              | 2.60                      | 0.03                                 | 3(199)                   | 0.13 |
| Picoplankton all <sup>1</sup>  | 161 (160)*       | 620*    | 10  | 0.05 | 7.7               | 3.13                      | 0.55                                 | 10(1)                    | 0.22 |
| Picoplankton only <sup>2</sup> | 110 (109)        | 378     | 9   | 0.06 | 6.9               | 3.15                      | 0.51                                 | 9(4)                     | 0.29 |
| Nanoplankton all <sup>3</sup>  | 197 (194)*       | 1,033*  | 10  | 0.05 | 10.5              | 3.18                      | 0.57                                 | 13(4)                    | 0.15 |
| Nanoplankton only <sup>4</sup> | 153 (150)        | 791     | 10  | 0.07 | 10.3              | 3.21                      | 0.56                                 | 13(4)                    | 0.17 |
| Bacteria all <sup>5</sup>      | 233 (230)**      | 1,236** | 10  | 0.04 | 10.6              | 3.34                      | 0.52                                 | 11(3)                    | 0.19 |
| Bacteria only <sup>6</sup>     | 185 (182)        | 803     | 10  | 0.05 | 8.7               | 3.50                      | 0.51                                 | 10(1)                    | 0.31 |
| Protists all <sup>7</sup>      | 147 (145)**      | 608**   | 5   | 0.06 | 8.3               | 2.40                      | 0.48                                 | 8(2)                     | 0.10 |
| Protist only <sup>8</sup>      | 80 (77)          | 175     | 5   | 0.05 | 4.4               | 2.54                      | 0.54                                 | 7(1)                     | 0.32 |

405  
 406  
 407  
 408  
 409  
 410  
 411  
 412

NB: Networks and sub-networks include OTUs and environmental factors. Di=Network diameter. De=Network density. Largest clique = size of the largest clique(s) in the network, and in brackets, the number of them. Mod = Network modularity inferred using edge betweenness. <sup>1</sup>All associations where picoplankton OTUs are involved (including nanoplankton); <sup>2</sup>Associations between picoplankton OTU only; <sup>3</sup>All associations where nanoplankton OTUs are involved (including picoplankton); <sup>4</sup>Associations between nanoplankton OTU only; <sup>5</sup>All associations where bacterial OTUs are involved (including protists); <sup>6</sup>Associations between bacterial OTU only; <sup>7</sup>All associations where protist OTUs are involved (including bacteria); <sup>8</sup>Associations between protist OTU only. \* Includes nodes and edges shared between pico- and nanoplankton. \*\* Includes nodes and edges shared between bacteria and protists.

413

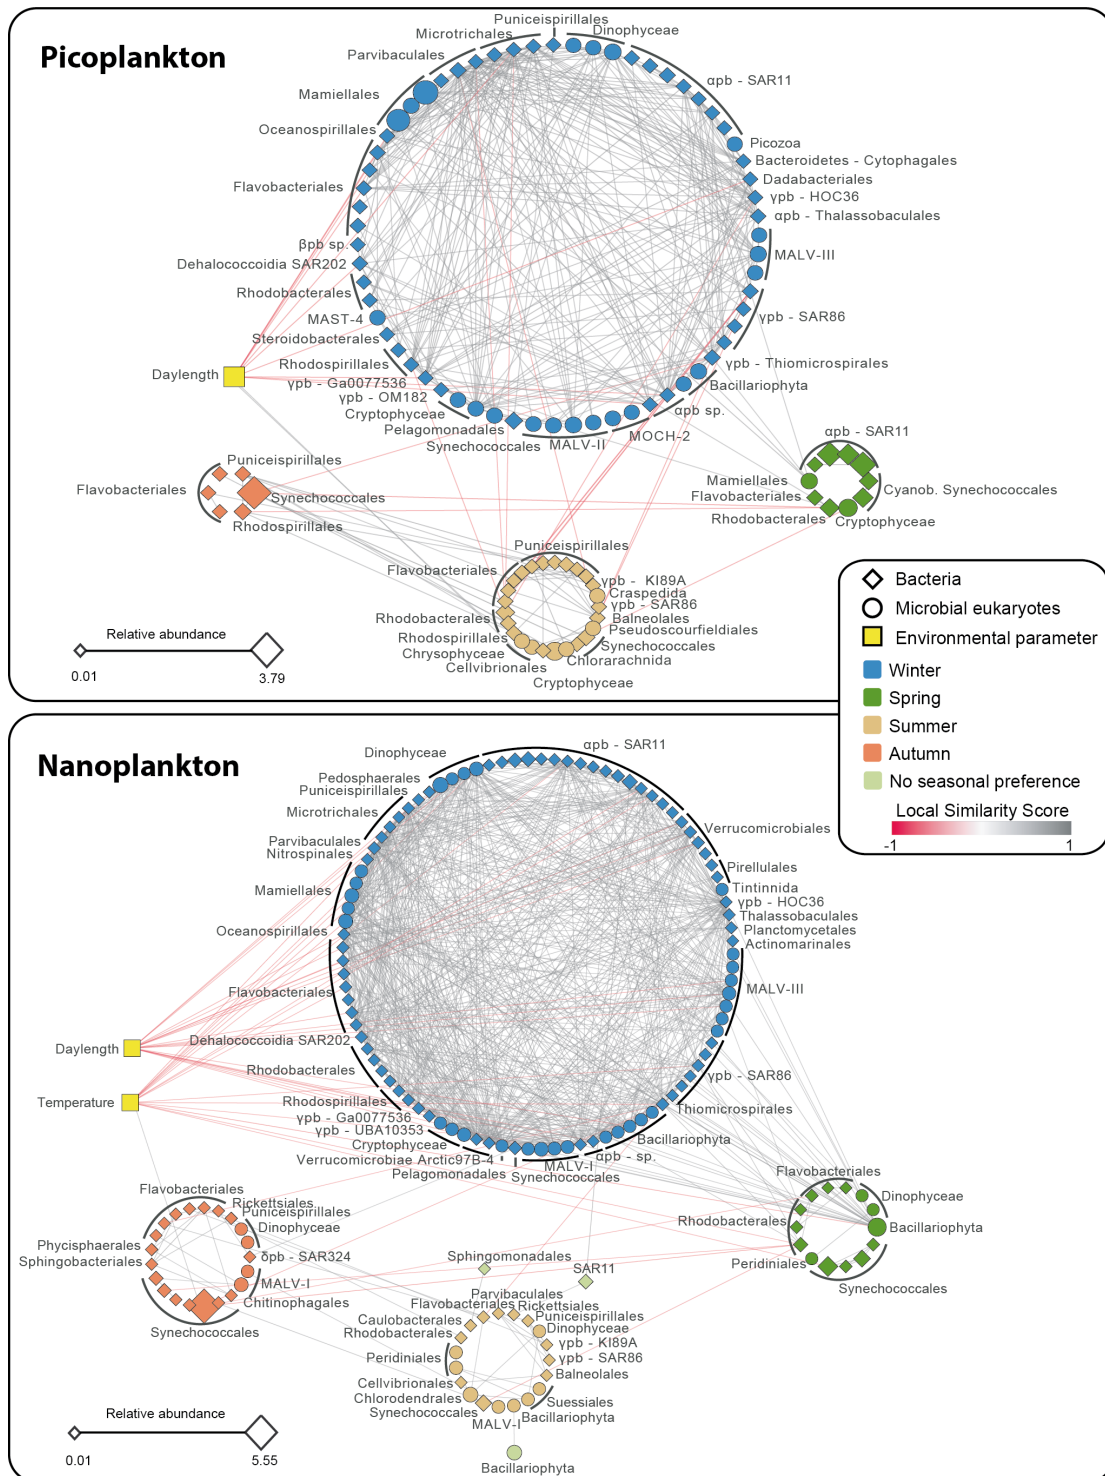

414

415

416 **Figure 4. Pico- and nanoplankton core sub-networks.** The shape of the nodes indicates

417 bacteria (rhomboid) or microbial eukaryotes (circle), and the color of nodes represents species

418 seasonal preferences, determined using the indicator value ( $p < 0.05$ ). The color of the edges

419 indicates if the association is positive (grey) or negative (red). Node size indicates OTU relative  
 420 abundance from the core microbiota.

421

422 **Table 4.** Core associations within and between taxonomic domains and size fractions.

| Network                        | Association type <sup>1</sup>   | # Associations |
|--------------------------------|---------------------------------|----------------|
| <b>Core network</b>            | Total                           | 1,411          |
|                                | Bacteria - Bacteria             | 767 (54%)      |
|                                | Bacteria - Protist              | 433 (31%)      |
|                                | Protist - Protist               | 161 (11%)      |
|                                | Environmental factor - Bacteria | 36 (3%)        |
|                                | Environmental factor - Protist  | 14 (1%)        |
| <b>Picoplankton subnetwork</b> | Total                           | 378            |
|                                | Bacteria - Bacteria             | 241 (64%)      |
|                                | Bacteria - Protist              | 94 (25%)       |
|                                | Protist - Protist               | 31 (8%)        |
|                                | Environmental factor - Bacteria | 12 (3%)        |
|                                | Environmental factor - Protist  | 0 (0%)         |
| <b>Nanoplankton subnetwork</b> | Total                           | 791            |
|                                | Bacteria - Bacteria             | 394 (50%)      |
|                                | Bacteria - Protist              | 246 (31%)      |
|                                | Protist - Protist               | 113 (14%)      |
|                                | Environmental factor - Bacteria | 24 (3%)        |
|                                | Environmental factor - Protist  | 14 (2%)        |

423 <sup>1</sup>"Bacteria – Bacteria" indicates associations between two bacterial OTUs. "Protist – Protist" are associations between two unicellular eukaryotes  
 424 and "Bacteria – Protist" are associations between one eukaryote and one bacterial OTU. "Environmental factor – Protist" and "Environmental  
 425 factor – Bacteria" are associations between an environmental factor and a eukaryotic or bacterial OTU.  
 426

#### 427 *Network seasonality*

428 The indicator value (IndVal) was used to infer the seasonal preference of core OTUs.  
 429 Most of the core OTUs (98%; 254 out of 259 OTUs) showed a clear preference for one  
 430 of the four seasons, pointing to a marked seasonality in the core microbiota (**Figure 4;**  
 431 **Table 5; Tables S4 & S5**). Winter had the highest quantity of core OTUs and the  
 432 highest network connectivity (average degree ~13), compared to the other seasons  
 433 (average degrees ~2 – ~6) [**Figure 4; Table 5**]. The average path length was larger in  
 434 the core network compared to a random network of the same size (**Table 3**). Yet, all  
 435 sub-networks associated with size fractions and seasons (**Table 5**) had shorter path  
 436 lengths than the random network,

437 that nodes tended to be connected within seasons and size fractions. This was also  
 438 supported by an increase in network density when comparing the core network (**Table**  
 439 **3**) and the core network subdivided into seasons (**Table 5**), against the core network  
 440 subdivided into both seasons and size fractions (**Table 5**). The five OTUs that did not  
 441 show any seasonal preference, among them SAR11 Clades Ia & II, showed high to  
 442 moderate abundances but had a low number of associations to other OTUs (**Tables S4,**  
 443 **S5, S6**). Thus, network connectivity in the BBMO appears to be heterogeneous over  
 444 time, peaking in winter and remaining low in the other seasons.

445

446 **Table 5:** Subnetworks including core OTUs displaying seasonal preference.

447

|      | Sub-network | Number of OTUs | Edges | Di. | De.  | Average degree | Average path length | Average clustering coefficient | Largest clique (#) | Mod. |
|------|-------------|----------------|-------|-----|------|----------------|---------------------|--------------------------------|--------------------|------|
| All  | Winter      | 156            | 1,175 | 7   | 0.10 | 15.1           | 2.62                | 0.54                           | 13(4)              | 0.19 |
|      | Spring      | 19             | 16    | 4   | 0.09 | 1.7            | 1.56                | 0.44                           | 4(1)               | 0.75 |
|      | Summer      | 41             | 56    | 7   | 0.07 | 2.7            | 2.90                | 0.49                           | 6(1)               | 0.53 |
|      | Autumn      | 26             | 25    | 3   | 0.08 | 1.9            | 1.59                | 0.46                           | 4(2)               | 0.73 |
| Pico | Winter      | 63             | 286   | 6   | 0.15 | 9.1            | 2.35                | 0.53                           | 9(4)               | 0.10 |
|      | Spring      | 8              | 5     | 3   | 0.18 | 1.2            | 1.50                | 0.00                           | 2(5)               | 0.56 |
|      | Summer      | 25             | 36    | 5   | 0.12 | 2.9            | 2.20                | 0.41                           | 6(1)               | 0.23 |
|      | Autumn      | 5              | 3     | 2   | 0.30 | 1.2            | 1.25                | 0.00                           | 2(3)               | 0.44 |
| Nano | Winter      | 92             | 658   | 6   | 0.16 | 14.3           | 2.40                | 0.61                           | 13(4)              | 0.04 |
|      | Spring      | 11             | 11    | 4   | 0.20 | 2.0            | 1.59                | 0.57                           | 4(1)               | 0.56 |
|      | Summer      | 13             | 17    | 3   | 0.22 | 2.6            | 1.70                | 0.65                           | 4(1)               | 0.50 |
|      | Autumn      | 17             | 18    | 3   | 0.13 | 2.1            | 1.35                | 0.56                           | 4(2)               | 0.60 |

448

449

450

NB: Subnetworks include OTUs only. Di=Network diameter. De=Network density. Largest clique = size of the largest clique(s) in the network, and in brackets, the number of them. Mod = Network modularity inferred using edge betweenness.

#### 451 *Groups of highly associated OTUs*

452 Within the core network, we identified groups that were more connected to each other  
 453 than to the rest of the network (called modules). These groups of OTUs may indicate  
 454 recurring associations that are likely important for the stability of ecosystem function.  
 455 We identified 12 modules in both the pico- and nanoplankton subnetworks (**Table S7**).  
 456 Modules tended to include OTUs from the same season (**Table S8**), with main modules  
 457 (i.e. MCODE score >4) including OTUs predominantly associated with winter,  
 458 summer, and autumn (**Figure 5**). Overall, winter modules prevailed (5 out of 7) among

459 the main modules (**Figure 5**), while modules with scores  $\leq 4$  did not tend to be  
460 associated with a specific season (**Table S8**). Two main winter modules had members  
461 that were negatively correlated to temperature and daylength (**Figure 5**; Modules 1 and  
462 4, nanoplankton).

463 The total relative sequence abundance of core OTUs included in modules was  
464 ~24% (proportional to the resident microbiota), while the total abundance of individual  
465 modules ranged between ~6% and ~0.3% (**Table S7**). In turn, the relative abundance  
466 of core OTUs included in modules ranged between 0.01% and ~2% (**Table S8**). In most  
467 modules, a few OTUs tended to dominate the abundance, although there were  
468 exceptions, such as module 4 of the picoplankton, where all SAR11 members featured  
469 abundances  $>1\%$  (**Table S8**). In addition, several OTUs within modules had relatively  
470 low abundances (**Table S8**), supporting modules as a real feature of the network and  
471 not just the agglomeration of abundant taxa.

472

#### 473 *Central OTUs*

474 Biological networks typically contain nodes (i.e. OTUs) that hold more “central”  
475 positions in the network than others [22]. Even though the ecological role of these hub  
476 and connector OTUs is unclear, it is acknowledged that they could reflect taxa with  
477 important ecological functions [22]. There is no universal definition for hub or  
478 connector OTUs, yet, in this work, we have used stringent thresholds to determine them  
479 *ad hoc* (see Methods). We have identified 13 hub-OTUs that were associated with  
480 winter or spring (**Table 6**). Hubs did not include highly abundant OTUs, such as  
481 *Synechococcus* or SAR11 (**Table 6**), but instead, they included several OTUs with  
482 moderate-low abundance ( $<1\%$ ) and high degree (ranging between 26-60) [**Table 6**].  
483 For example, the Gammaproteobacteria OTU bn\_000226 had a relative abundance of

484 0.04% and a degree of 60 (**Table 6**). Hubs included other moderately abundant OTUs,  
 485 such as the eukaryotic picoalgae *Bathycoccus*, which was abundant in winter, as well  
 486 as an unidentified dinoflagellate (**Table 6**).

487 We identified a total of 18 connector OTUs (featuring relatively low degree and  
 488 high centrality), which were predominantly associated with summer (5 out of 18) or  
 489 autumn (6 out of 18), contrasting with hub OTUs, which were associated mostly with  
 490 winter and spring (**Table 6**). Connectors may be linked to the seasonal transition  
 491 between main community states (**Figure 1 C & D**) and included several abundant  
 492 OTUs belonging to *Synechococcus* and SAR11 (**Table 6**). In particular, the SAR11  
 493 OTU bp\_000007 displayed a relatively high abundance (1.4%), but a degree of 3  
 494 (relatively low) and a betweenness centrality of 0.6 (relatively high). In contrast, two  
 495 protist OTUs displayed low-moderate abundances (ep\_00269, Chrysophyceae,  
 496 abundance 0.04% and en\_00161, Syndiniales, abundance 0.4%), low degree <4, but a  
 497 high betweenness centrality (>0.8; **Table 6**).

498

499 **Table 6. Central OTUs**

| OTU               | Class               | Lowest rank taxonomy          | Relative Abundance (%) <sup>1</sup> | Degree | Betweenness Centrality | Closeness Centrality | Season |
|-------------------|---------------------|-------------------------------|-------------------------------------|--------|------------------------|----------------------|--------|
| <b>Hubs</b>       |                     |                               |                                     |        |                        |                      |        |
| en_00092          | Mamiellophyceae     | <i>Bathycoccus</i>            | 0.51                                | 42     | 0.04                   | 0.42                 | Winter |
| en_00119          | Dinophyceae         | -                             | 0.41                                | 50     | 0.03                   | 0.42                 | Winter |
| bp_000037         | Alphaproteobacteria | Parvibaculales_OCS116         | 0.31                                | 45     | 0.08                   | 0.43                 | Winter |
| bp_000039         | Gammaproteobacteria | SUP05_cluster                 | 0.28                                | 29     | 0.12                   | 0.41                 | Spring |
| bn_000039         | Gammaproteobacteria | SUP05_cluster                 | 0.21                                | 42     | 0.17                   | 0.44                 | Spring |
| bn_000037         | Alphaproteobacteria | Parvibaculales_OCS116         | 0.20                                | 40     | 0.05                   | 0.42                 | Spring |
| bp_000059         | Gammaproteobacteria | SAR86                         | 0.20                                | 24     | 0.09                   | 0.40                 | Spring |
| ep_00070          | Cryptophyceae       | Cryptomonadales_X             | 0.13                                | 40     | 0.04                   | 0.42                 | Winter |
| bn_000059         | Gammaproteobacteria | SAR86                         | 0.12                                | 24     | 0.03                   | 0.40                 | Spring |
| bn_000102         | Alphaproteobacteria | Nisaeaceae_OM75               | 0.09                                | 26     | 0.03                   | 0.38                 | Winter |
| bp_000193         | Alphaproteobacteria | -                             | 0.06                                | 37     | 0.03                   | 0.40                 | Winter |
| bn_000170         | Acidimicrobiia      | Sva0996_marine_group          | 0.06                                | 59     | 0.06                   | 0.44                 | Winter |
| bn_000226         | Gammaproteobacteria | HOC36                         | 0.04                                | 60     | 0.06                   | 0.43                 | Winter |
| <b>Connectors</b> |                     |                               |                                     |        |                        |                      |        |
| bp_000001         | Oxyphotobacteria    | <i>Synechococcus</i> (CC9902) | 3.79                                | 5      | 0.05                   | 0.30                 | Autumn |
| bp_000002         | Alphaproteobacteria | SAR11 Clade_la                | 2.26                                | 2      | 0.40                   | 0.56                 | Spring |
| bp_000004         | Alphaproteobacteria | SAR11 Clade_la                | 2.02                                | 3      | 0.15                   | 0.63                 | NA     |
| bp_000007         | Alphaproteobacteria | SAR11 Clade_la                | 1.38                                | 3      | 0.60                   | 0.71                 | NA     |
| bp_000008         | Alphaproteobacteria | SAR11 Clade_la                | 1.15                                | 3      | 0.15                   | 0.63                 | NA     |
| bn_000008         | Alphaproteobacteria | SAR11 Clade_la                | 0.68                                | 5      | 0.03                   | 0.27                 | Winter |

|           |                     |                                |      |   |      |      |        |
|-----------|---------------------|--------------------------------|------|---|------|------|--------|
| en_00059  | Chlorodendrophyceae | <i>Tetraselmis</i>             | 0.66 | 4 | 0.05 | 0.26 | Summer |
| bn_000020 | Oxyphotobacteria    | -                              | 0.56 | 3 | 0.60 | 0.67 | Autumn |
| en_00161  | Syndiniales         | Syndiniales-Group-I-Clade-4_X  | 0.42 | 4 | 0.80 | 0.75 | Autumn |
| bn_000018 | Oxyphotobacteria    | <i>Prochlorococcus</i> MIT9313 | 0.41 | 5 | 0.04 | 0.24 | Winter |
| bn_000054 | Alphaproteobacteria | Puniceispirillales_SAR116      | 0.11 | 4 | 0.14 | 0.40 | Autumn |
| bn_000062 | Alphaproteobacteria | Puniceispirillales_SAR116      | 0.08 | 3 | 0.55 | 0.50 | Autumn |
| bn_000077 | Rhodothermia        | <i>Balneola</i>                | 0.07 | 3 | 0.17 | 0.32 | Summer |
| bn_000112 | Gammaproteobacteria | KI89A                          | 0.06 | 4 | 0.53 | 0.48 | Summer |
| bn_000156 | Alphaproteobacteria | Parvibaculales_PS1             | 0.05 | 4 | 0.14 | 0.40 | Summer |
| bn_000281 | Bacteroidia         | Sphingobacteriales_NS11-12     | 0.05 | 5 | 0.16 | 0.44 | Autumn |
| bn_000221 | Alphaproteobacteria | Puniceispirillales_SAR116      | 0.04 | 5 | 0.05 | 0.30 | Winter |
| ep_00269  | Chrysophyceae       | Clade-I_X                      | 0.04 | 2 | 1.00 | 1.00 | Summer |

500 <sup>1</sup> Proportional to the resident microbiota

501



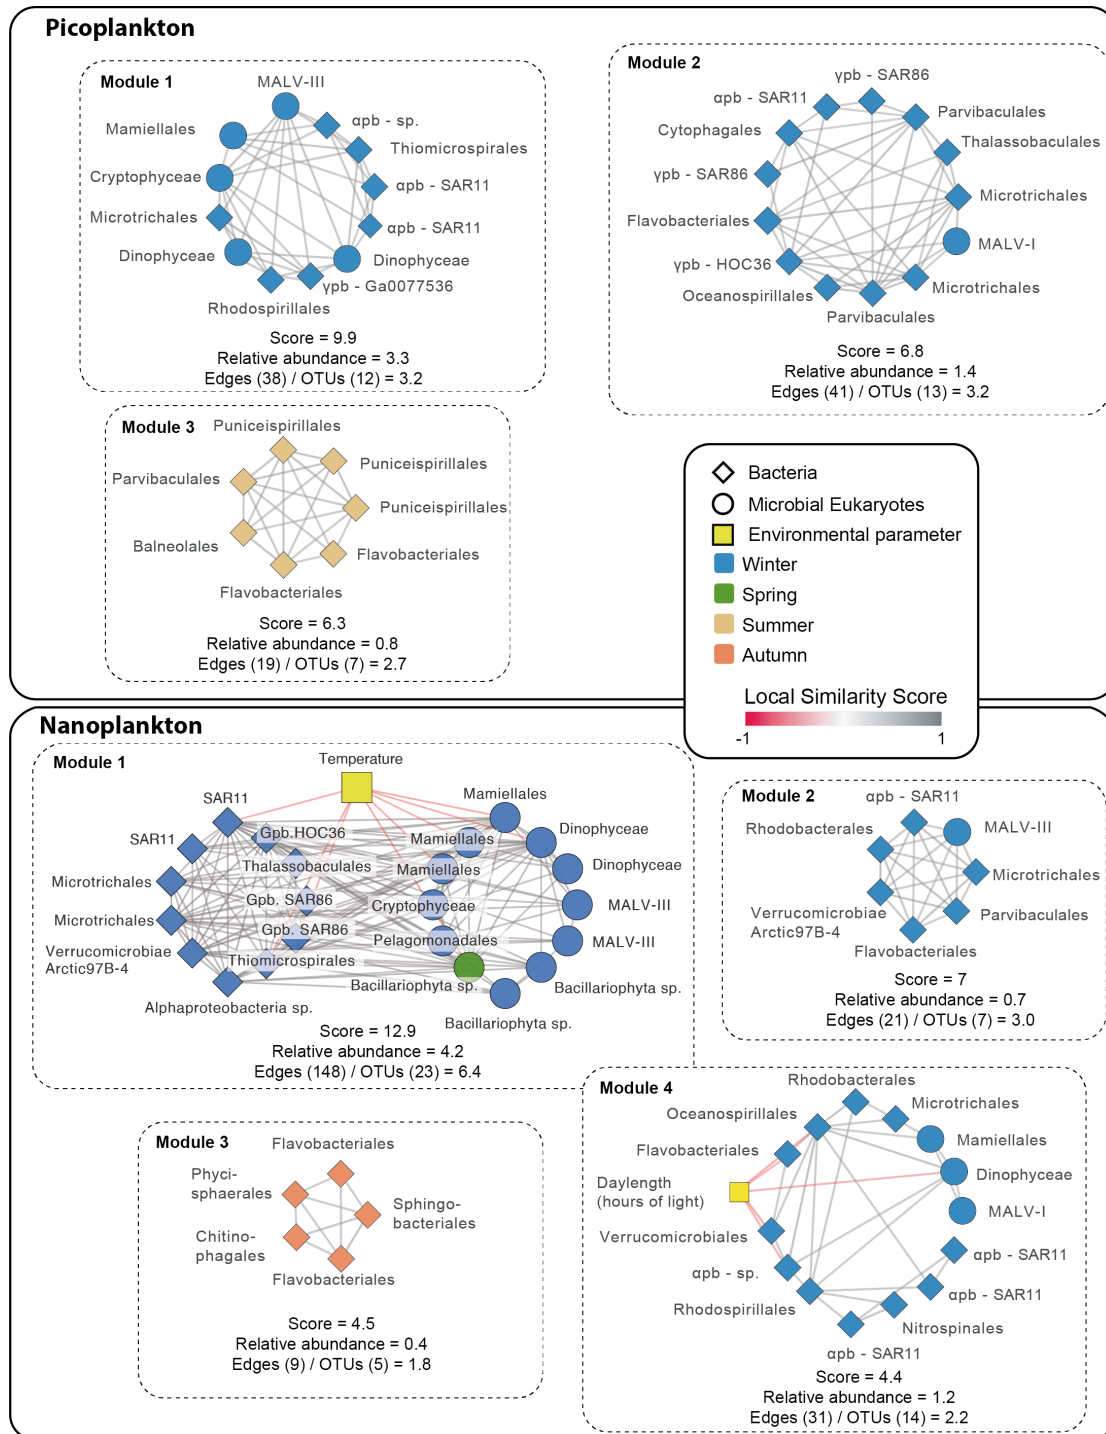

502

503

504

505

506

507

508

509

**Figure 5. Main modules in the core network.** Modules with MCODE score >4 are shown for picoplankton (upper panel) and nanoplankton (lower panel). For each module, the MCODE score and relative amplicon abundance of the taxa included in it (as % of the resident microbiota) are indicated. In addition, the numbers of edges and OTUs within the modules are shown as edges/OTUs; this quotient estimates the average number of edges per OTU within the different modules. The edges represent correlations with  $|LS| > 0.7$ ,  $|p| > 0.7$ ,  $P < 0.001$  and  $Q < 0.001$ . The color of the edges indicates positive (grey) or negative (red) associations. The shape of nodes

510 indicates bacteria (rhomboid) or microbial eukaryotes (circle), and the color of nodes represents  
511 species seasonal preferences, determined using the indicator value ( $p < 0.05$ ).  $pb =$   
512 Proteobacteria

513

514

## 515 **DISCUSSION**

516 Identifying the most important microbes for the functioning of the ocean ecosystem is  
517 a challenge, which can be addressed by delineating core microbiotas [4]. Recognizing  
518 the most abundant and widespread microbes in the ocean is a step towards knowing the  
519 core microbiota. However, this does not take into account the importance that both  
520 microbial interactions and microbes with moderate or low abundance may have for the  
521 functioning of ecosystems [4, 29, 38]. Considering potential interactions when  
522 delineating core microbiotas may not only allow identifying moderate/low abundance  
523 taxa that may have important roles in the community but could also allow excluding  
524 taxa that are present in several locations but that may not have an important role for  
525 community function (e.g., dormant cells or cells being dispersed [8]). Here, we have  
526 delineated and analyzed the core microbiota of a coastal ecosystem-based on 10 years  
527 of occurrence data considering possible interactions.

528 To detect the core microbiota, we first identified the resident OTUs, that is,  
529 those that occur  $>30\%$  of the time (i.e.  $>36$  out of 120 months) over a decade. This  
530 threshold was selected as it allows for seasonal OTUs that would be present recurrently  
531 in at least one season. Analysis of the resident OTU dynamics indicated a clear  
532 seasonality (**Figure 1 C-D**), and that the measured environmental factors could explain  
533  $\sim 45\%$  of the resident microbiota variance. The main environmental drivers were  
534 temperature and daylength, which is consistent with previous works from the same  
535 time-series (BBMO) [34, 39, 40]. These values are lower than what has been reported

536 for bacteria in the English Channel, where daylength explains ~65% of community  
537 variance [17], and higher than what has been reported for entire communities in the  
538 time-series SPOT (California, 31%) [41] or SOLA (the Mediterranean Sea, ~130 km  
539 from BBMO; 7-12%) [42]. Daylength may be more important in the English Channel  
540 as it has a more pronounced annual variation than at BBMO, whereas the measured  
541 differences could reflect a higher coupling of the resident OTUs with environmental  
542 variation in BBMO than in SOLA or SPOT. SOLA is characterized by the occasional  
543 winter storms that bring nutrients from the sediments to the water column as well as by  
544 the freshwater inputs from nearby rivers during flash floods [43], and this could  
545 partially explain the differences with BBMO. The importance of daylength and  
546 temperature for community dynamics was reflected by niche analyses, which identified  
547 two main niches associated with summer and winter at the BBMO, to which ~50% of  
548 the resident OTUs were associated (**Figure 1 E-F**). Other resident OTUs likely have  
549 spring and fall niches as indicated by **Figure 1 C-D**, yet these niches cannot be detected  
550 with the used null model analysis, as their preferred temperatures or daylengths will not  
551 depart significantly from the randomized mean.

552         Based on the resident OTUs, we built networks to define the core microbiota.  
553 We identified a total of 259 core OTUs (182 bacteria and 77 protists) that represented  
554 64% of the abundance of the resident microbiota and that showed seasonal variation.  
555 We could only find supporting evidence from the literature (PIDA database) [21] for  
556 85 associations of the core (6 %), indicating that most of them still need to be validated  
557 with direct observation or experimentally. This is not surprising, as the most studied  
558 hosts in PIDA are protists from the micro-plankton (>20 µm cell size), which are mostly  
559 absent from our pico- and nanoplankton networks. Also, PIDA does not cover Bacteria-  
560 Bacteria associations. Nevertheless, the detected core OTUs from BBMO represent a

561 fraction of the core microbiota at this site, since larger microbial size fractions were not  
562 sampled. Including these larger size fractions would expand the composition of the core  
563 and could unveil additional patterns. For example, in a global ocean network including  
564 size fractions >20  $\mu\text{m}$  cell size, protists or small multicellular eukaryotes dominated the  
565 interactome [26].

566       Alpha-/Gammaproteobacteria, Bacteroidia, Acidimicrobiia were the main  
567 bacterial groups in the core, including also common marine taxa, such as  
568 *Synechococcus* or SAR11. The main protists in the core included Syndiniales  
569 (parasites), Dinoflagellates, Mamiellales (*Micromonas* and *Bathycoccus*), and  
570 diatoms. These taxa are likely the most important in sustaining ecosystem function at  
571 BBMO, and probably have similar importance in other coastal areas. Other studies have  
572 reported important roles in marine association networks for SAR11 and *Synechococcus*  
573 [31, 44]. Syndiniales, Haptophytes, and Dinoflagellates dominated networks in terms  
574 of the number of nodes and edges at SPOT, while Mamiellales (*Micromonas* &  
575 *Bathycoccus*) and diatoms also had relevant roles [41]. Syndiniales, Dinoflagellates,  
576 and Diatoms were also predominant in global ocean networks, which is coherent with  
577 our results [26].

578       Bacteria-Bacteria associations were the most abundant (54%) in the core  
579 BBMO microbiota, followed by Bacteria-Protists (31%) and Protist-Protist (11%)  
580 associations. Associations tended to occur among bacteria or protists, rather than  
581 between them, in the English Channel time-series [17]. However, the study used  
582 microscopy to determine protist community composition, while it used 16S-rRNA gene  
583 data for analyzing bacteria communities and this might explain the limited number of  
584 connections between protists and bacteria. Most associations occurred among protists  
585 in a global-ocean network that included a broad range of microbial size-fractions [26].

586 This suggests that time-series analyses including larger size-fractions may determine a  
587 higher proportion of associations among protists, which may turn out to be prevalent.

588 The core network had “small world” properties (that is, high clustering  
589 coefficient and relatively short path lengths) [37] when compared to randomized  
590 networks (**Table 3**) or particular subnetworks from size fractions or specific seasons  
591 (**Table 5**). The small-world topology is characteristic of many different types of  
592 networks [45], including marine microbial temporal or spatial networks [23, 26, 30,  
593 31]. Some of our network statistics were similar to those obtained at SPOT [23, 30], in  
594 particular the averages of degree, clustering coefficient, and path length (**Table 3**).  
595 Furthermore, the BBMO network had an average path length similar to a global ocean  
596 network [26] and also, similarly to this network, the node degree of the BBMO core  
597 members was independent of their relative abundances, showing that the associations  
598 between core OTUs were not merely a consequence of high prevalence and abundance.

599 The BBMO core network had a clustering coefficient that was ten times larger  
600 than that of an Erdős–Rényi random network of the same size (**Table 3**), which agrees  
601 with what was observed at SPOT [23, 30]. The large proportion of positive associations  
602 in BBMO networks (~95%) was in agreement with results from other temporal [23, 41]  
603 or large-scale spatial [26] microbiota analyses, where positive associations were also  
604 predominant (~70-98%), although these values include taxa that are not necessarily part  
605 of the core. This suggests that interactions such as syntrophy or symbiotic associations  
606 are more important than competition in marine microbial systems and that these types  
607 of associations may underpin marine ecosystem function. These findings are also  
608 coherent with a recent large-scale literature survey that found that ~47% of the validated  
609 associations between protists and bacteria are symbiotic [21]. Nevertheless, it is also  
610 possible that common sampling strategies and methodological approaches do not detect

611 a substantial fraction of negative associations. For example, while positive correlations  
612 in taxa abundance pointing to positive interactions may be easier to detect, negative  
613 associations may be missed due to plummeting species abundances that would prevent  
614 establishing significant correlations, or to a delay between the increase and decrease in  
615 abundance of interacting taxa that are not synchronized with sampling time. Future  
616 studies adapting the sampling scheme to the timing of interactions (e.g., daily or weekly  
617 sampling) and the use of other approaches apart from taxa abundances, such as analyses  
618 of single-cell genomic data to determine protistan predation, or controlled experiments,  
619 will likely generate new insights on negative microbial interactions.

620         The relatively high clustering coefficient of the core network (compared to a  
621 random network) and its short path length indicate that most OTUs are connected  
622 through  $< 3$  intermediary OTUs. It has been shown that a large proportion of strong  
623 positive associations, as in the BBMO core network, may destabilize communities due  
624 to positive feedbacks between species [46]. When a species decreases in abundance as  
625 a response to environmental variation, it may pull others with it, generating a cascade  
626 effect propagated by the many positive associations in the network. Accordingly, the  
627 change of abundance in specific OTUs in one section of the network could affect OTUs  
628 in other network sections not necessarily affected directly by the environmental  
629 variation. This cascade effect may help to explain a paradox: environmental variables  
630 affect the structure of marine microbial communities and consequently association  
631 networks. Yet, our and others' results [17, 18, 23, 26, 30-32] have reported a limited  
632 number of associations between environmental variables and network nodes (OTUs).  
633 Environmental heterogeneity might affect network structure by acting on a small subset  
634 of nodes (OTUs), which would then influence other nodes through cascading

635 interactions facilitated by the highly interconnected nature of the networks as well as  
636 positive feedbacks promoted by the high proportion of positive associations [46].

637         If OTUs susceptible to environmental variation are also highly connected, then  
638 their effect on the entire network structure may be larger. In line with this, we found  
639 that the connectivity of OTUs associated with environmental variables at BBMO (49  
640 OTUs out of 259) had a mean degree of  $\sim 25$  (SD  $\sim 14$ ), while for all the 259 OTUs of  
641 the core network, the mean degree was  $\sim 11$  (SD  $\sim 13$ ). The seasonal dynamics of the  
642 BBMO microbiota may partially be driven by a subset of OTUs that vary with  
643 environmental factors (e.g. temperature, daylength). These may exert a destabilizing  
644 influence over the entire community over time, promoting the annual turnover of  
645 communities and networks.

646         Most core OTUs (98%) showed a clear preference for one season. Interestingly,  
647 the distribution of core OTUs among the seasons was uneven, with 61% of these OTUs  
648 showing a winter preference. Network connectivity at BBMO was correspondingly  
649 heterogeneous between seasons, peaking in winter and remaining low in the other  
650 seasons. Specifically, the winter subnetwork included  $\sim 92\%$  of the seasonal edges. This  
651 indicates that winter associations are not only specific (i.e. they do not tend to change  
652 partners), but they also have a relatively high recurrence (otherwise, winter networks  
653 would be smaller). A higher similarity between winter communities when compared to  
654 other seasons was also indicated by our ordination analyses of the resident OTUs  
655 (**Figure 1**), as well as by studies of the entire protist community at BBMO [34] or whole  
656 community analyses at SPOT [23].

657         The structure of communities is determined by the interplay of selection,  
658 dispersal, speciation, and ecological drift [47]. Our results indicate that selection, a  
659 deterministic process, is stronger in winter, leading to winter sub-communities that tend

660 to be more similar between each other than to communities from other seasons. Given  
661 that we have removed edges associated with the measured environmental variables, we  
662 do not expect that the identified edges between winter OTUs represent selection  
663 associated to these variables (e.g. low temperature). Consequently, winter edges may  
664 represent associations linked to unmeasured variables or ecological interactions that  
665 may be more likely to develop during winter due to stronger environmental selection.  
666 Due to weaker selection in other seasons species occurrence would display less  
667 recurrent (or more random) patterns, preventing specific associations to be formed. This  
668 also suggests that ecological redundancy changes over time, and is lower in winter  
669 compared to the other seasons (even though the number of OTUs is larger in winter).  
670 A reduction in redundancy may also promote strong ecological interactions in winter.

671 The existence of subsets of species that interact more often between themselves  
672 than with other species (modules), is characteristic of biological networks, and can  
673 contribute to overall network stability [48, 49]. Modules can represent divergent  
674 selection, niches, the clustering of evolutionary closely related species or co-  
675 evolutionary units [50, 51]. Modules in the core BBMO network (total 12) included  
676 positive associations between diverse taxa, and could represent divergent selection,  
677 driven by unmeasured environmental variables, or examples of syntrophic or symbiotic  
678 interactions between microbes from different taxonomic groups.

679 Most BBMO modules included diverse lifestyles (heterotrophs, mixotrophs,  
680 phototrophs, parasites), similar to what has been observed at SPOT [41]. Yet, a number  
681 of modules appeared to be predominantly heterotrophic or autotrophic (**Table S8**).  
682 Some modules included OTUs from the same species, such as Module 4 in the  
683 picoplankton, which included several SAR11 Clade I OTUs, and Module 7 of the  
684 nanoplankton, which included several *Synechococcus* OTUs. These modules could



685 reflect similar niches, associated with unmeasured variables, or the dependence on  
686 metabolites produced by other organisms (auxotrophy). There is evidence of  
687 auxotrophy for both SAR11 (e.g. thiamin, glycine)[52-54] and *Synechococcus* (e.g.  
688 cobalamin) [55]. Recently it has been observed in co-culture experiments that  
689 *Prochlorococcus* may fulfill some metabolic requirements of SAR11, promoting the  
690 growth of the latter in a commensal relationship [56]. In our analyses of the BBMO  
691 core microbiota, we did not find strong associations between SAR11 and  
692 *Prochlorococcus* or the more abundant relative, *Synechococcus*. Yet, SAR11 formed  
693 strong associations with a plethora of taxa with which could potentially have  
694 commensal relationships.

695         The overall importance of the observed modules was indicated by the total  
696 abundance of their constituent OTUs (24% of the reads compared to the resident  
697 microbiota). Most of the modules at BBMO were associated with a single season,  
698 suggesting that they reflect seasonal niches. Since these modules were inferred over 10  
699 years, they represent recurrent network features. Chafee et al. [57] also identified  
700 season-specific modules in a 2-year time series in the North Sea (Helgoland), including  
701 samples taken weekly or bi-weekly. These modules were much larger than ours, and  
702 they may also include environmentally-driven edges. Nevertheless, the Helgoland  
703 modules seem to be driven by eutrophic (spring & summer) vs. oligotrophic (autumn  
704 & winter) conditions in this location. In contrast, the BBMO modules, displayed weaker  
705 correlations with nutrients and seem to be influenced by temperature and daylength  
706 (**Figure 5**). Differences in the sampling scheme between Helgoland and BBMO  
707 ((bi)weekly vs. monthly) as well as between both locations (different seas and latitudes,  
708 affecting temperature and daylength) may explain these differences.

709           Keystone species have a high influence in ecosystems relative to their  
710 abundance [58]. Network analyses may help to identify them [24, 59], yet, there is no  
711 clear consensus of what network features are the best unequivocal indicator of keystone  
712 species [60-62]. Therefore, we focused on identifying central OTUs (hubs or  
713 connectors) that may be important for ecosystem function [22, 24] and could represent  
714 keystone species. We identified 13 hubs in the BBMO core network with moderate-low  
715 abundances (<1%) and high degree (26-60) that were associated with winter or spring.  
716 These moderate-low abundance OTUs may affect nutrient cycling directly [63] or  
717 indirectly, by affecting other OTUs with higher abundance. The putative stronger  
718 selection exerted by low temperatures and short daylengths during winter and early  
719 spring, as compared to summer and autumn, may lead to a higher species recurrence  
720 [34], larger networks, and possibly, more hubs. An OTU of the abundant picoalgae  
721 *Bathycoccus* (en\_00092) was identified as a winter hub, which is consistent with  
722 reported *Bathycoccus* abundance peaks in late winter (February-March) in both BBMO  
723 [64] and the nearby station SOLA [42]. This *Bathycoccus* hub may be associated with  
724 diverse taxa, such as prokaryotes that may benefit from algal exudates [65] or even via  
725 mixotrophy [66]. In agreement with this, out of the 42 associations of this hub OTU,  
726 25 were with bacteria and the rest with protists.

727           In contrast to hubs, connector OTUs were predominantly associated with  
728 warmer waters, that is, summer and autumn, and may represent transitions in  
729 community states. This was consistent with the associations observed in an abundant  
730 *Synechococcus* connector OTU (bp\_000001, **Table 6**). This OTU was predominant in  
731 summer-autumn, in agreement with previous BBMO reports [36, 67], but it was  
732 associated with other OTUs from spring (negative association with bp\_000017), winter  
733 (negative association with bp\_000039), summer (positive association with bp\_000087,

734 bp\_000012) and autumn (positive association with bp\_000022), thus likely holding a  
735 central position in the network. Another abundant spring connector OTU (SAR11 Clade  
736 Ia, bp\_000002), featured only two connections to spring (positive association with  
737 bp\_000007) and summer (positive association with bp\_000046) OTUs.

738

## 739 **CONCLUSION**

740 Our decade-long analysis of the dynamics of a microbiota populating a time-series in  
741 the Mediterranean Sea allowed us to determine the interconnected core microbiota,  
742 which likely includes several microbes that are important for the functioning of this  
743 coastal ecosystem. We found a relatively small core microbiota that displayed seasonal  
744 variation, with a heterogeneous distribution of associations over different seasons,  
745 indicating different degrees of recurrence and selection strength over the year. Future  
746 analyses of other core marine microbiotas will determine how universal are the patterns  
747 found in BBMO. These studies will be crucial to determine potential long-term effects  
748 of climate change on the architecture of the interaction networks that underpin the  
749 functioning of the ocean ecosystem.

## 750 **METHODS**

### 751 *Study site and sampling*

752 Surface water (~1 m depth) was sampled monthly from January 2004 to December  
753 2013 at the Blanes Bay Microbial Observatory (BBMO) in the Northwestern  
754 Mediterranean Sea (41°40'N, 2°48'E) [**Figure 1A**]. The BBMO is an oligotrophic  
755 coastal site ~1 km offshore with ~20 m depth and with limited riverine or human  
756 influence [36]. Seawater was pre-filtered with a 200 µm nylon mesh and then  
757 transported to the laboratory in 20 L plastic carboys and processed within 2 hours.  
758 Microbial plankton from about 6 L of the pre-filtered seawater was separated into two

759 size fractions: picoplankton (0.2-3  $\mu\text{m}$ ) and nanoplankton fraction (3-20  $\mu\text{m}$ ). To  
760 achieve this, the seawater was first filtered through a 20  $\mu\text{m}$  nylon mesh using a  
761 peristaltic pump. Then the nanoplankton (3-20  $\mu\text{m}$ ) was captured on a 3  $\mu\text{m}$  pore-size  
762 polycarbonate filter. Subsequently, a 0.2  $\mu\text{m}$  pore-size Sterivex unit (Millipore,  
763 Durapore) was used to capture the picoplankton (0.2-3  $\mu\text{m}$ ). Sterivex units and 3  $\mu\text{m}$   
764 filters were stored at -80  $^{\circ}\text{C}$  until further processed. The sequential filtering process  
765 aimed to capture free-living bacteria and picoeukaryotes in the 0.2-3  $\mu\text{m}$  size fraction  
766 (picoplankton), and particle/protist-attached bacteria or nanoeukaryotes in the 3-20  $\mu\text{m}$   
767 fraction (nanoplankton). The 3 $\mu\text{m}$  filter was replaced if clogging was detected; DNA  
768 from all 3 $\mu\text{m}$  filters from the same sample were extracted together.

769 A total of 15 contextual abiotic and biotic variables were considered for each  
770 sampling point: Daylength (hours of light), Temperature ( $^{\circ}\text{C}$ ), Turbidity (estimated as  
771 Secchi disk depth [m]), Salinity, Total Chlorophyll a [Chla] ( $\mu\text{g/l}$ ),  $\text{PO}_4^{3-}$  ( $\mu\text{M}$ ),  $\text{NH}_4^+$   
772 ( $\mu\text{M}$ ),  $\text{NO}_2^-$  ( $\mu\text{M}$ ),  $\text{NO}_3^-$  ( $\mu\text{M}$ ),  $\text{SiO}_2$  ( $\mu\text{M}$ ), abundances of Heterotrophic prokaryotes  
773 [HP] (cells/ml), *Synechococcus* (cells/ml), Total photosynthetic nanoflagellates [PNF;  
774 2-5 $\mu\text{m}$  size] (cells/ml), small PNF (2 $\mu\text{m}$  ; cells/ml) and, Heterotrophic nanoflagellates  
775 [HNF] (cells/ml) [**Figure 1B**]. Water temperature and salinity were sampled *in situ* with  
776 a SAIV A/S SD204 CTD. Inorganic nutrients ( $\text{NO}_3^-$ ,  $\text{NO}_2^-$ ,  $\text{NH}_4^+$ ,  $\text{PO}_4^{3-}$ ,  $\text{SiO}_2$ ) were  
777 measured using an Alliance Evolution II autoanalyzer [68]. Cell counts were done by  
778 flow cytometry (heterotrophic prokaryotes, *Synechococcus*) or epifluorescence  
779 microscopy (PNF, small PNF and HNF). See Gasol *et al.* [36] for specific details on  
780 how other variables were measured. Environmental variables were z-score standardized  
781 before running statistical analysis.

782

783 *DNA extraction, sequencing, and metabarcoding*

784 DNA was extracted from the filters using a standard phenol-chloroform protocol [69],  
785 purified in Amicon Units (Millipore), and quantified and qualitatively checked with a  
786 NanoDrop 1000 Spectrophotometer (Thermo Fisher Scientific). Eukaryotic PCR  
787 amplicons were generated for the V4 region of the 18S rDNA (~380 bp), using the  
788 primer pair TAREukFWD1 and TAREukREV3 [70]. The primers Bakt\_341F [71] and  
789 Bakt\_806RB [72] were used to amplify the V4 region of the 16S rDNA. PCR  
790 amplification and amplicon sequencing were carried out at the Research and Testing  
791 Laboratory (<http://rtlgenomics.com/>) on the *Illumina* MiSeq platform (2x250 bp paired-  
792 end sequencing). DNA sequences and metadata are publicly available at the European  
793 Nucleotide Archive (<http://www.ebi.ac.uk/ena>; accession numbers PRJEB23788 for  
794 18S rRNA genes & PRJEB38773 for 16S rRNA genes).

795 A total of 29,952,108 and 16,940,406 paired-end *Illumina* reads were produced  
796 for microbial eukaryotes and prokaryotes respectively. Adapters and primers were  
797 removed with Cutadapt v1.16 [73]. DADA2 v1.10.1 [74] was used for quality control,  
798 trimming, and inference of Operational Taxonomic Units (OTUs) as Amplicon  
799 Sequence Variants (ASVs). For both microbial eukaryotes and prokaryotes, the  
800 Maximum number of expected errors (MaxEE) was set to 2 and 4 for the forward and  
801 reverse reads respectively. No ambiguous bases (Ns) were allowed. Microbial  
802 eukaryotic sequences were trimmed to 220 bp (forward) and 190 bp (reverse), while  
803 prokaryotic sequences were trimmed to 225 bp (both forward and reverse reads). A  
804 total of 28,876 and 19,604 OTUs were inferred for microbial eukaryotes and  
805 prokaryotes respectively.

806 OTUs were assigned taxonomy using the naïve Bayesian classifier method [75]  
807 together with the SILVA version 132 [76] database as implemented in DADA2.  
808 Eukaryotic OTUs were also BLASTed [77] against the Protist Ribosomal Reference

809 database (PR<sup>2</sup>, version 4.10.0; [78]). When the taxonomic assignments for the  
810 eukaryotes disagreed between SILVA and PR<sup>2</sup>, the conflict was resolved manually by  
811 inspecting a pairwise alignment of the OTU and the closest hits from the two databases.  
812 OTUs assigned to Metazoa, Streptophyta, nucleomorph, chloroplast, and mitochondria  
813 were removed before further analysis. Archaea were removed from downstream  
814 analyses as the used primers are not optimal for recovering this domain [79].

815 Each sample (corresponding to a specific gene, size fraction, and timepoint) was  
816 subsampled with the *rrarefy* function from the R package *Vegan* [80] to 4,907 reads,  
817 corresponding to the number of reads in the sample with the lowest sequencing depth,  
818 to normalize for different sequencing depth between samples. OTUs present in <10%  
819 of the samples were removed. After quality control and rarefaction, the number of  
820 OTUs was 2,926 (1,561 bacteria, and 1,365 microeukaryotes; **Table 1**).

821 Due to a suboptimal sequencing of the amplicons, we did not use nanoplankton  
822 samples of bacteria and protists from the period May 2010 to July 2012 (27 samples)  
823 as well as March 2004 and February 2005. OTU read abundance for samples with  
824 missing values were estimated using seasonally aware missing value imputation by  
825 weighted moving average for time series as implemented in the R package *imputeTS*  
826 [81].

827 Cell/particle dislodging or filter clogging during the sequential filtration process  
828 may affect the taxonomic diversity observed in the different size fractions, with  
829 nanoplankton DNA leaking into the picoplankton fraction, or picoplankton DNA  
830 getting stuck in the nanoplankton fraction. To minimize the effects of cell/particle  
831 dislodging or filter clogging on the diversity recovered from the different size fractions,  
832 we calculated the sequence-abundance ratio for OTUs appearing in both pico- and  
833 nano-plankton fractions. When the ratio exceeded 2:1, we removed the OTU from the

834 size fraction with the lowest number of reads. After subsampling and filtering the OTU  
835 tables were joined for each time point, and since the samples had been normalized to  
836 the same sequencing depth, we calculated the relative read abundance for the OTUs for  
837 each year and aggregated over the corresponding months along the 10 years for the  
838 resident microbiota. This means that the relative abundance for both domains and size  
839 fractions sums up to 1 for each month across ten years.

840

#### 841 *Resident microbiota*

842 We defined *ad hoc* the resident microbiota as the set of OTUs present in >30% of the  
843 samples over 10 years (that is, present in >36 months, not necessarily consecutive).  
844 This value was chosen as it allows for seasonal OTUs, which may only be present 3-4  
845 months each year, and still be considered as part of the resident microbiota. The  
846 residents included 355 eukaryotic and 354 bacteria OTUs (**Table 1**), and excluded a  
847 substantial amount of rare OTUs, which can cause spurious correlations during network  
848 construction due to sparsity [i.e. too many zeros] [22]. The relative abundance of the  
849 taxonomic groups included in the resident microbiota was fairly stable from year to  
850 year (**Figure 3**).

851

#### 852 *Environmental variation and resident OTUs*

853 All possible correlations among the measured environmental variables and resident  
854 OTU richness and abundance were computed in R and plotted with the package  
855 *corrplot*. Only significant Pearson correlation coefficients were considered ( $p < 0.01$ ),  
856 and the p-values were corrected for multiple inference (Holm's method) using the  
857 function *rcorr.adjust* from the R package *RcmdrMisc*. Unconstrained ordination  
858 analyses were carried out using NMDS based on Bray Curtis dissimilarities between

859 samples including resident OTUs only. Environmental variables were fitted to the  
860 NMDS using the function *envfit* from the R package *Vegan* [80]. Only variables  
861 displaying a significant correlation ( $p < 0.05$ ) were considered. Constrained ordination  
862 was performed using distance-based redundancy analyses (dbRDA) in *Vegan*,  
863 considering Bray Curtis dissimilarities between samples including resident OTUs only.  
864 The most relevant variables for constrained ordination were selected by stepwise model  
865 selection using 200 permutations, as implemented in *ordistep* (*Vegan*). Ordinations  
866 were plotted using the R package *ggplot2* and *ggord*. The amount of community  
867 variance explained by the different environmental variables was calculated with *Adonis*  
868 (*Vegan*) using 999 permutations. Resident OTUs displaying niche preference in terms  
869 of Temperature and Daylength, the most important environmental variables, were  
870 determined using the function *niche.val* from the R package *EcolUtils* with 1,000  
871 permutations.

872

### 873 *Delineation of seasons*

874 Seasons were defined following Gasol *et al.* [36] with a small modification: months  
875 with water temperature (at the sampling time)  $> 17^{\circ}\text{C}$  and daylength  $> 14\text{ h d}^{-1}$  were  
876 considered to be summer. Months with water temperature  $< 17^{\circ}\text{C}$  and  $< 11\text{ h d}^{-1}$  of  
877 daylength were considered to be winter. Months with water temperature  $> 17^{\circ}\text{C}$  and  
878 daylength  $< 14\text{ h d}^{-1}$  were considered as autumn, while months with water temperature  
879  $< 17^{\circ}\text{C}$  and  $> 11\text{ h d}^{-1}$  of daylength were considered to be spring. The indicator value  
880 [82] was calculated using the R package *labdsv* [83] to infer OTU seasonal preference.

881

### 882 *Core microbiota delineated using networks*



883 OTUs from the resident microbiota together with the 15 environmental variables were  
884 used to construct association networks using extended Local Similarity Analysis  
885 (eLSA) [84-86]. eLSA was run on the OTU table with subsampled reads with default  
886 normalization: a z-score transformation using the median and median absolute  
887 deviation. P-value estimations were run under a mixed model that performs a random  
888 permutation test of a co-occurrence only if the theoretical p-values for the comparison  
889 are  $<0.05$ . Bonferroni false discovery rate ( $q$ ) was calculated for all edges based on the  
890 p-values using the *p.adjust* package in R.

891 To detect environmentally-driven associations between OTUs induced by the  
892 measured environmental variables we used the program EnDED [87].  
893 Environmentally-driven associations indicate similar or different environmental  
894 preferences between OTUs and not ecological interactions. In short, EnDED evaluates  
895 associations between two OTUs that are both connected to the same environmental  
896 variable based on a combination of four methods: *Sign Pattern*, *Overlap*, *Interaction*  
897 *Information*, and *Data Processing Inequality*. These methods use the sign (positive or  
898 negative) and the duration of the association, the relative abundance of OTUs as well  
899 as environmental parameters to determine if an association is environmentally-driven.  
900 If the four methods agreed that an association was environmentally-driven, then it was  
901 removed from the network. The initial number of edges was 199,937, of which 180,345  
902 were OTU-OTU edges that were at least in one triplet with an environmental parameter.  
903 In total 65,280 (~33%) edges in the network were identified as indirect by EnDED and  
904 removed. Afterward, only edges representing the strongest associations (i.e., absolute  
905 local similarity score  $|LS| > 0.7$ , Spearman correlation  $|\rho| > 0.7$ ,  $P < 0.001$  and  $Q < 0.001$ )  
906 were retained for downstream analysis and are hereafter referred to as “core  
907 associations”. Those OTUs participating in core associations were defined as core

908 OTUs, although their involvement in ecological interactions need further experimental  
909 validation. Both core associations and core OTUs constitute the “core network”, which  
910 also represents the core microbiota (both “core network” and “core microbiota” are  
911 used indistinctively). The core network was randomized using the Erdős–Rényi model  
912 [88], using 262 nodes and 1,411 edges.

913 For the core network, we calculated: 1) *Density*: quantifies the proportion of  
914 actual network connections out of the total number of possible connections, 2)  
915 *Transitivity* or *Clustering coefficient*: measures the probability that nodes connected to  
916 a node are also connected, forming tight clusters, 3) *Average path length*: mean number  
917 of steps (edges) along the shortest paths for all possible pairs of nodes in the network  
918 (a low average path length indicates that most species in the network are connected  
919 through a few intermediate species), 4) *Degree*: number of associations per node, 5)  
920 *Betweenness centrality*: measures how often an OTU (node) appears on the shortest  
921 paths between other OTUs in the network, 6) *Closeness centrality*: indicates how close  
922 a node is to all other nodes in a network, 7) *Cliques*: refers to sets of interconnected  
923 nodes where all possible connections are realized, 8) *Modularity*: measures the division  
924 of a given network into modules (that is, groups of OTUs that are highly interconnected  
925 between themselves).

926 The Degree, Betweenness centrality and Closeness centrality were used to  
927 identify central OTUs using *ad hoc* definitions. “Hub” OTUs were those with a score  
928 above the average for the three statistics and were normally among the top 25% in each  
929 score [22, 62, 89]. Specifically, hub OTUs featured a degree >24, Betweenness  
930 centrality >0.03 and Closeness centrality >0.3. Similarly, “connector” OTUs were  
931 defined as those featuring a relatively low degree and high centrality and could be seen  
932 as elements that connect different regions of a network or modules [50]. Connector

933 OTUs featured a degree  $< 5$ , Betweenness centrality  $> 0.03$  and Closeness centrality  
934  $> 0.2$ . Network statistics were calculated with *igraph* in R [90] , Gephi [91] and  
935 Cytoscape v3.6.1 [92]. Visualizations were made in Cytoscape v3.6.1. Modules in the  
936 core network were identified with MCODE [93].

937

938

## 939 **DECLARATIONS**

940

941 *Ethics approval and consent to participate*

942 *Not applicable*

943

944 *Consent for publication*

945 *Not applicable*

946

947 *Availability of data and materials*

948 DNA sequences and metadata are publicly available at the European Nucleotide  
949 Archive (<http://www.ebi.ac.uk/ena>; accession numbers PRJEB23788 [18S rRNA  
950 genes] & PRJEB38773 [16S rRNA genes]).

951

952 *Competing interests*

953 The authors declare that they have no competing interests

954

955 *Funding*

956 RL was supported by a Ramón y Cajal fellowship (RYC-2013-12554, MINECO,  
957 Spain). IMD was supported by an ITN-SINGEK fellowship (ESR2-EU-H2020-MSCA-

958 ITN-2015, Grant Agreement 675752 [ESR2] to RL). This work was supported by the  
959 projects INTERACTOMICS (CTM2015-69936-P, MINECO, Spain to RL),  
960 MicroEcoSystems (240904, RCN, Norway to RL), MINIME (PID2019-105775RB-  
961 I00, AEI, Spain, to RL), ALLFLAGS (CTM2016-75083-R, MINECO to RM), MIAU  
962 (RTI2018-101025-B-I00, to JMG) and DEVOTES (grant agreement n° 308392,  
963 European Union to EG). It was further supported by Grup Consolidat de Recerca  
964 2017SGR/1568 (Generalitat de Catalunya).

965

#### 966 *Authors' contributions*

967 AKK & RL designed the study. JMG, RM organized sampling. VB, CRG & IF  
968 collected samples, extracted the DNA, and organized its sequencing. AKK, RL & ID  
969 analyzed the data, while JMG, RM, IF, CRG & EG, provided contextual ecological or  
970 environmental pre-processed data. AKK, MFMB & RL interpreted the results. AKK &  
971 RL wrote the manuscript. All authors contributed substantially to manuscript revisions.  
972 All authors read and approved the final manuscript.

973

#### 974 *Acknowledgements*

975 We thank all members of the Blanes Bay Microbial Observatory sampling and analyses  
976 team. Bioinformatics analyses were performed at the MARBITS platform of the Institut  
977 de Ciències del Mar (ICM; <http://marbits.icm.csic.es>).

978

#### 979 **REFERENCES**

- 980 1. Gitay H, Wilson JB, Lee WG. Species Redundancy: A Redundant Concept?  
981 Journal of Ecology. 1996; 84(1):121-124.  
982 2. Louca S, Parfrey LW, Doebeli M. Decoupling function and taxonomy in the  
983 global ocean microbiome. Science. 2016; 353:1272-1277.

- 984 3. Galand PE, Pereira O, Hochart C, Auguet JC, Debroas D. A strong link between  
985 marine microbial community composition and function challenges the idea of  
986 functional redundancy. *ISME J.* 2018; 12(10):2470-2478.
- 987 4. Shade A, Handelsman J. Beyond the Venn diagram: the hunt for a core  
988 microbiome. *Environ Microbiol.* 2012; 14(1):4-12.
- 989 5. Little AEF, Robinson CJ, Peterson SB, Raffa KF, Handelsman J. Rules of  
990 Engagement: Interspecies Interactions that Regulate Microbial Communities.  
991 *Annual Review of Microbiology.* 2008; 62(1):375-401.
- 992 6. Lennon JT, Jones SE. Microbial seed banks: the ecological and evolutionary  
993 implications of dormancy. *Nat Rev Microbiol.* 2011; 9(2):119-130.
- 994 7. Singer E, Wagner M, Woyke T. Capturing the genetic makeup of the active  
995 microbiome in situ. *ISME J.* 2017; 11(9):1949-1963.
- 996 8. Mestre M, Höfer J. The Microbial Conveyor Belt: Connecting the Globe  
997 through Dispersion and Dormancy. *Trends Microbiol.* 2021; in press.
- 998 9. Turnbaugh PJ, Ley RE, Hamady M, Fraser-Liggett CM, Knight R, Gordon JI.  
999 The Human Microbiome Project. *Nature.* 2007; 449(7164):804-810.
- 1000 10. Wirth R, Kádár G, Kakuk B, Maróti G, Bagi Z, Szilágyi Á, Rákhely G, Horváth  
1001 J, Kovács KL. The Planktonic Core Microbiome and Core Functions in the  
1002 Cattle Rumen by Next Generation Sequencing. *Front Microbiol.* 2018; 9(2285).
- 1003 11. Rubio-Portillo E, Kersting DK, Linares C, Ramos-Esplá AA, Antón J.  
1004 Biogeographic Differences in the Microbiome and Pathobiome of the Coral  
1005 *Cladocora caespitosa* in the Western Mediterranean Sea. *Front Microbiol.*  
1006 2018; 9(22).
- 1007 12. Sweet MJ, Bulling MT. On the Importance of the Microbiome and Pathobiome  
1008 in Coral Health and Disease. *Frontiers in Marine Science.* 2017; 4(9).
- 1009 13. Lurgi M, Thomas T, Wemheuer B, Webster NS, Montoya JM. Modularity and  
1010 predicted functions of the global sponge-microbiome network. *Nature*  
1011 *communications.* 2019; 10(1):992.
- 1012 14. Björk JR, O'Hara RB, Ribes M, Coma R, Montoya JM. The dynamic core  
1013 microbiome: Structure, dynamics and stability. *bioRxiv.* 2018.
- 1014 15. Delgado-Baquerizo M, Oliverio AM, Brewer TE, Benavent-González A,  
1015 Eldridge DJ, Bardgett RD, Maestre FT, Singh BK, Fierer N. A global atlas of  
1016 the dominant bacteria found in soil. *Science.* 2018; 359:320-325.
- 1017 16. Logares R, Deutschmann IM, Junger PC, Giner CR, Krabberød AK, Schmidt  
1018 TSB, Rubinat-Ripoll L, Mestre M, Salazar G, Ruiz-González C *et al.*  
1019 Disentangling the mechanisms shaping the surface ocean microbiota.  
1020 *Microbiome.* 2020; 8(1):55.
- 1021 17. Gilbert JA, Steele JA, Caporaso JG, Steinbruck L, Reeder J, Temperton B, Huse  
1022 S, McHardy AC, Knight R, Joint I *et al.* Defining seasonal marine microbial  
1023 community dynamics. *ISME J.* 2012; 6(2):298-308.
- 1024 18. Chow CE, Sachdeva R, Cram JA, Steele JA, Needham DM, Patel A, Parada  
1025 AE, Fuhrman JA. Temporal variability and coherence of euphotic zone bacterial  
1026 communities over a decade in the Southern California Bight. *ISME J.* 2013;  
1027 7(12):2259-2273.
- 1028 19. Worden AZ, Follows MJ, Giovannoni SJ, Wilken S, Zimmerman AE, Keeling  
1029 PJ. Rethinking the marine carbon cycle: factoring in the multifarious lifestyles  
1030 of microbes. *Science.* 2015; 347(6223):1257594.
- 1031 20. Krabberød AK, Bjorbækmo MFM, Shalchian-Tabrizi K, Logares R. Exploring  
1032 the oceanic microeukaryotic interactome with metaomics approaches. *Aquat*  
1033 *Microb Ecol.* 2017; 79(1):1-12.

- 1034 21. Bjorbaekmo MFM, Evenstad A, Rosaeg LL, Krabberod AK, Logares R. The  
1035 planktonic protist interactome: where do we stand after a century of research?  
1036 ISME J. 2020; 14(2):544-559.
- 1037 22. Röttjers L, Faust K. From hairballs to hypotheses - biological insights from  
1038 microbial networks. FEMS Microbiol Rev. 2018; 42(6):761-780.
- 1039 23. Chow CE, Kim DY, Sachdeva R, Caron DA, Fuhrman JA. Top-down controls  
1040 on bacterial community structure: microbial network analysis of bacteria, T4-  
1041 like viruses and protists. ISME J. 2014.
- 1042 24. Layeghifard M, Hwang DM, Guttman DS. Disentangling Interactions in the  
1043 Microbiome: A Network Perspective. Trends Microbiol. 2017; 25(3):217-228.
- 1044 25. Fuhrman JA, Cram JA, Needham DM. Marine microbial community dynamics  
1045 and their ecological interpretation. Nat Rev Microbiol. 2015; 13(3):133-146.
- 1046 26. Lima-Mendez G, Faust K, Henry N, Decelle J, Colin S, Carcillo F, Chaffron S,  
1047 Ignacio-Espinosa JC, Roux S, Vincent F *et al.* Determinants of community  
1048 structure in the global plankton interactome. Science. 2015;  
1049 348(6237):1262073.
- 1050 27. Ponisio LC, Valdovinos FS, Allhoff KT, Gaiarsa MP, Barner A, Guimarães PR,  
1051 Hembry DH, Morrison B, Gillespie R. A Network Perspective for Community  
1052 Assembly. Frontiers in Ecology and Evolution. 2019; 7(103).
- 1053 28. Chaffron S, Rehrauer H, Pernthaler J, von Mering C. A global network of  
1054 coexisting microbes from environmental and whole-genome sequence data.  
1055 Genome Res. 2010; 20(7):947-959.
- 1056 29. Krabberod AK, Bjorbaekmo MFM, Shalchian-Tabrizi K, Logares R. Exploring  
1057 the oceanic microeukaryotic interactome with metaomics approaches. Aquat  
1058 Microb Ecol. 2017; 79(1):1-12.
- 1059 30. Cram JA, Xia LC, Needham DM, Sachdeva R, Sun F, Fuhrman JA. Cross-depth  
1060 analysis of marine bacterial networks suggests downward propagation of  
1061 temporal changes. ISME J. 2015; 9(12):2573-2586.
- 1062 31. Steele JA, Countway PD, Xia L, Vigil PD, Beman JM, Kim DY, Chow CE,  
1063 Sachdeva R, Jones AC, Schwalbach MS *et al.* Marine bacterial, archaeal and  
1064 protistan association networks reveal ecological linkages. ISME J. 2011;  
1065 5(9):1414-1425.
- 1066 32. Needham DM, Fuhrman JA. Pronounced daily succession of phytoplankton,  
1067 archaea and bacteria following a spring bloom. Nat Microbiol. 2016;  
1068 1(4):16005.
- 1069 33. Deutschmann IM, Lima-Mendez G, Krabberød AK, Raes J, Vallina SM, Faust  
1070 K, Logares R. Disentangling environmental effects in microbial association  
1071 networks. preprint. 2021.
- 1072 34. Giner CR, Balague V, Krabberod AK, Ferrera I, Rene A, Garces E, Gasol JM,  
1073 Logares R, Massana R. Quantifying long-term recurrence in planktonic  
1074 microbial eukaryotes. Mol Ecol. 2019; 28(5):923-935.
- 1075 35. Alonso-Saez L, Balague V, Sa EL, Sanchez O, Gonzalez JM, Pinhassi J,  
1076 Massana R, Pernthaler J, Pedros-Alio C, Gasol JM. Seasonality in bacterial  
1077 diversity in north-west Mediterranean coastal waters: assessment through clone  
1078 libraries, fingerprinting and FISH. FEMS Microbiol Ecol. 2007; 60(1):98-112.
- 1079 36. Gasol JM, Cardelus C, Moran XAG, Balague V, Forn I, Marrase C, Massana  
1080 R, Pedros-Alio C, Sala MM, Simo R *et al.* Seasonal patterns in phytoplankton  
1081 photosynthetic parameters and primary production at a coastal NW  
1082 Mediterranean site. Sci Mar. 2016; 80(S1):63-77.

- 1083 37. Watts DJ, Strogatz SH. Collective dynamics of 'small-world' networks. *Nature*.  
1084 1998; 393(6684):440-442.
- 1085 38. Pedrós-Alió C. The rare bacterial biosphere. *Ann Rev Mar Sci*. 2012; 4:449-  
1086 466.
- 1087 39. Mestre M, Höfer J, Sala MM, Gasol JM. Seasonal Variation of Bacterial  
1088 Diversity Along the Marine Particulate Matter Continuum. *Front Microbiol*.  
1089 2020; 11(1590).
- 1090 40. Auladell A, Sánchez P, Sánchez O, Gasol JM, Ferrera I. Long-term seasonal  
1091 and interannual variability of marine aerobic anoxygenic photoheterotrophic  
1092 bacteria. *ISME J*. 2019; 13(8):1975-1987.
- 1093 41. Berdjeb L, Parada A, Needham DM, Fuhrman JA. Short-term dynamics and  
1094 interactions of marine protist communities during the spring-summer transition.  
1095 *ISME J*. 2018; 12:1907–1917.
- 1096 42. Lambert S, Tragin M, Lozano JC, Ghiglione JF, Vaulot D, Bouget FY, Galand  
1097 PE. Rhythmicity of coastal marine picoeukaryotes, bacteria and archaea despite  
1098 irregular environmental perturbations. *ISME J*. 2019; 13(2):388-401.
- 1099 43. Charles F, Lantoiné F, Brugel S, Chrétiennot-Dinet M-J, Quiroga I, Rivière B.  
1100 Seasonal survey of the phytoplankton biomass, composition and production in  
1101 a littoral NW Mediterranean site, with special emphasis on the picoplanktonic  
1102 contribution. *Estuarine, Coastal and Shelf Science*. 2005; 65(1):199-212.
- 1103 44. Milici M, Deng Z-L, Tomasch J, Decelle J, Wos-Oxley ML, Wang H, Jáuregui  
1104 R, Plumeier I, Giebel H-A, Badewien TH *et al*. Co-occurrence Analysis of  
1105 Microbial Taxa in the Atlantic Ocean Reveals High Connectivity in the Free-  
1106 Living Bacterioplankton. *Front Microbiol*. 2016; 7(649).
- 1107 45. Newman M. *Networks*: Oxford University Press; 2018.
- 1108 46. Coyte KZ, Schluter J, Foster KR. The ecology of the microbiome: Networks,  
1109 competition, and stability. *Science*. 2015; 350:663-666.
- 1110 47. Vellend M. *The theory of ecological communities*. Princeton: Princeton  
1111 University Press; 2016.
- 1112 48. Stouffer DB, Bascompte J. Compartmentalization increases food-web  
1113 persistence. *Proceedings of the National Academy of Sciences*. 2011; 108:3648-  
1114 3652.
- 1115 49. Krause AE, Frank KA, Mason DM, Ulanowicz RE, Taylor WW. Compartments  
1116 revealed in food-web structure. *Nature*. 2003; 426(6964):282-285.
- 1117 50. Olesen JM, Bascompte J, Dupont YL, Jordano P. The modularity of pollination  
1118 networks. *Proceedings of the National Academy of Sciences*. 2007; 104:19891-  
1119 19896.
- 1120 51. Medeiros LP, Garcia G, Thompson JN, Guimarães PR. The geographic mosaic  
1121 of coevolution in mutualistic networks. *Proceedings of the National Academy  
1122 of Sciences*. 2018; 115:12017-12022.
- 1123 52. Tripp HJ, Schwalbach MS, Meyer MM, Kitner JB, Breaker RR, Giovannoni SJ.  
1124 Unique glycine-activated riboswitch linked to glycine-serine auxotrophy in  
1125 SAR11. *Environ Microbiol*. 2009; 11(1):230-238.
- 1126 53. Carini P, Steindler L, Beszteri S, Giovannoni SJ. Nutrient requirements for  
1127 growth of the extreme oligotroph '*Candidatus Pelagibacter ubique*'  
1128 HTCC1062 on a defined medium. *ISME J*. 2013; 7(3):592-602.
- 1129 54. Carini P, Campbell EO, Morré J, Sañudo-Wilhelmy SA, Cameron Thrash J,  
1130 Bennett SE, Temperton B, Begley T, Giovannoni SJ. Discovery of a SAR11  
1131 growth requirement for thiamin's pyrimidine precursor and its distribution in  
1132 the Sargasso Sea. *ISME J*. 2014; 8(8):1727-1738.

- 1133 55. Włodarczyk A, Selão TT, Norling B, Nixon PJ. Newly discovered  
1134 *Synechococcus* sp. PCC 11901 is a robust cyanobacterial strain for high biomass  
1135 production. *Communications Biology*. 2020; 3(1):215.
- 1136 56. Becker JW, Hogle SL, Rosendo K, Chisholm SW. Co-culture and biogeography  
1137 of *Prochlorococcus* and SAR11. *ISME J*. 2019; 13(6):1506-1519.
- 1138 57. Chafee M, Fernández-Guerra A, Buttigieg PL, Gerds G, Eren AM, Teeling H,  
1139 Amann RI. Recurrent patterns of microdiversity in a temperate coastal marine  
1140 environment. *ISME J*. 2018; 12(1):237-252.
- 1141 58. Paine RT. A Note on Trophic Complexity and Community Stability. *The*  
1142 *American Naturalist*. 1969; 103(929):91-93.
- 1143 59. Banerjee S, Schlaeppi K, van der Heijden MGA. Keystone taxa as drivers of  
1144 microbiome structure and functioning. *Nat Rev Microbiol*. 2018; 16:567-576.
- 1145 60. Berry D, Widder S. Deciphering microbial interactions and detecting keystone  
1146 species with co-occurrence networks. *Front Microbiol*. 2014; 5(MAY):219.
- 1147 61. Freilich MA, Wieters E, Broitman BR, Marquet PA, Navarrete SA. Species co-  
1148 occurrence networks: Can they reveal trophic and non-trophic interactions in  
1149 ecological communities? *Ecology*. 2018; 99(3):690-699.
- 1150 62. Banerjee S, Kirkby CA, Schmutter D, Bissett A, Kirkegaard JA, Richardson  
1151 AE. Network analysis reveals functional redundancy and keystone taxa  
1152 amongst bacterial and fungal communities during organic matter decomposition  
1153 in an arable soil. *Soil Biology and Biochemistry*. 2016; 97:188-198.
- 1154 63. Pester M, Bittner N, Deevong P, Wagner M, Loy A. A 'rare biosphere'  
1155 microorganism contributes to sulfate reduction in a peatland. *ISME J*. 2010;  
1156 4(12):1591-1602.
- 1157 64. Zhu F, Massana R, Not F, Marie D, Vaulot D. Mapping of picoeucaryotes in  
1158 marine ecosystems with quantitative PCR of the 18S rRNA gene. *FEMS*  
1159 *Microbiol Ecol*. 2005; 52(1):79-92.
- 1160 65. Seymour JR, Amin SA, Raina JB, Stocker R. Zooming in on the phycosphere:  
1161 the ecological interface for phytoplankton-bacteria relationships. *Nat*  
1162 *Microbiol*. 2017; 2:17065.
- 1163 66. Farnelid HM, Turk-Kubo KA, Zehr JP. Identification of Associations between  
1164 Bacterioplankton and Photosynthetic Picoeukaryotes in Coastal Waters. *Front*  
1165 *Microbiol*. 2016; 7(339).
- 1166 67. Auladell A, Barberán A, Logares R, Garcés E, Gasol JM, Ferrera I. Seasonal  
1167 niche differentiation between evolutionary closely related marine bacteria.  
1168 *bioRxiv*. 2020.
- 1169 68. Grasshoff K, Kremling K, Ehrhardt M. *Methods of Seawater Analysis: Third,*  
1170 *Completely Revised and Extended Edition*; 2007.
- 1171 69. Massana R, Castresana J, Balague V, Guillou L, Romari K, Groisillier A,  
1172 Valentin K, Pedros-Alio C. Phylogenetic and ecological analysis of novel  
1173 marine stramenopiles. *Appl Environ Microbiol*. 2004; 70(6):3528-3534.
- 1174 70. Stoeck T, Bass D, Nebel M, Christen R, Jones MD, Breiner HW, Richards TA.  
1175 Multiple marker parallel tag environmental DNA sequencing reveals a highly  
1176 complex eukaryotic community in marine anoxic water. *Mol Ecol*. 2010; 19  
1177 *Suppl 1(SUPPL. 1)*:21-31.
- 1178 71. Herlemann DPR, Labrenz M, Jürgens K, Bertilsson S, Waniek JJ, Andersson  
1179 AF. Transitions in bacterial communities along the 2000 km salinity gradient of  
1180 the Baltic Sea. *ISME J*. 2011; 5(10):1571-1579.



- 1181 72. Apprill A, McNally S, Parsons R, Weber L. Minor revision to V4 region SSU  
1182 rRNA 806R gene primer greatly increases detection of SAR11  
1183 bacterioplankton. *Aquat Microb Ecol.* 2015; 75(2):129-137.
- 1184 73. Martin M. Cutadapt removes adapter sequences from high-throughput  
1185 sequencing reads. *EMBnet Journal.* 2011; 17(1):10-12.
- 1186 74. Callahan BJ, McMurdie PJ, Rosen MJ, Han AW, Johnson AJ, Holmes SP.  
1187 DADA2: High-resolution sample inference from Illumina amplicon data. *Nat*  
1188 *Methods.* 2016; 13(7):581-583.
- 1189 75. Wang Q, Garrity GM, Tiedje JM, Cole JR. Naive Bayesian classifier for rapid  
1190 assignment of rRNA sequences into the new bacterial taxonomy. *Appl Environ*  
1191 *Microbiol.* 2007; 73(16):5261-5267.
- 1192 76. Quast C, Pruesse E, Yilmaz P, Gerken J, Schweer T, Yarza P, Peplies J,  
1193 Glockner FO. The SILVA ribosomal RNA gene database project: improved  
1194 data processing and web-based tools. *Nucleic Acids Res.* 2013; 41(Database  
1195 issue):D590-596.
- 1196 77. Altschul SF, Gish W, Miller W, Myers EW, Lipman DJ. Basic local alignment  
1197 search tool. *Journal of molecular biology.* 1990; 215(3):403-410.
- 1198 78. Guillou L, Bachar D, Audic S, Bass D, Berney C, Bittner L, Boutte C, Burgaud  
1199 G, de Vargas C, Decelle J *et al.* The Protist Ribosomal Reference database  
1200 (PR2): a catalog of unicellular eukaryote small sub-unit rRNA sequences with  
1201 curated taxonomy. *Nucleic Acids Res.* 2013; 41(Database issue):D597-604.
- 1202 79. McNichol J, Berube PM, Biller SJ, Fuhrman JA. Evaluating and Improving  
1203 SSU rRNA PCR Primer Coverage via Metagenomes from Global Ocean  
1204 Surveys. *bioRxiv.* 2020.
- 1205 80. Oksanen J, Guillaume Blanchet FFM, Kindt R, Legendre P, McGlinn D,  
1206 Minchin PR, O'Hara RB, Simpson GL, Solymos P, Stevens MHH *et al.* *vegan*:  
1207 *Community Ecology Package.* R package. In.; 2016.
- 1208 81. Moritz S. *imputeTS: Time Series Missing Value Imputation.* In.; 2017.
- 1209 82. Dufrene M, Legendre P. Species assemblages and indicator species: The need  
1210 for a flexible asymmetrical approach. *Ecological Monographs.* 1997.
- 1211 83. Roberts DW. *labdsv: Ordination and Multivariate Analysis for Ecology.* R  
1212 package version 1.8-0. In.; 2016.
- 1213 84. Ruan Q, Dutta D, Schwalbach MS, Steele JA, Fuhrman JA, Sun F. Local  
1214 similarity analysis reveals unique associations among marine bacterioplankton  
1215 species and environmental factors. *Bioinformatics.* 2006; 22(20):2532-2538.
- 1216 85. Xia LC, Ai D, Cram JA, Liang X, Fuhrman JA, Sun F. Statistical significance  
1217 approximation in local trend analysis of high-throughput time-series data using  
1218 the theory of Markov chains. *BMC Bioinformatics.* 2015; 16(1):301.
- 1219 86. Xia LC, Ai D, Cram J, Fuhrman JA, Sun F. Efficient statistical significance  
1220 approximation for local similarity analysis of high-throughput time series data.  
1221 *Bioinformatics.* 2013; 29(2):230-237.
- 1222 87. Deutschmann IM, Lima-Mendez G, Krabberød AK, Raes J, Vallina SM, Faust  
1223 K, Logares R. Disentangling environmental effects in microbial association  
1224 networks. *ResearchSquare.* 2020.
- 1225 88. Erdős P, Rényi A. On random graphs. *Publicationes Mathematicae.* 1959;  
1226 6:290-297.
- 1227 89. Banerjee S, Baah-Acheamfour M, Carlyle CN, Bissett A, Richardson AE,  
1228 Siddique T, Bork EW, Chang SX. Determinants of bacterial communities in  
1229 Canadian agroforestry systems. *Environ Microbiol.* 2016; 18(6):1805-1816.

- 1230 90. Yu G, Chen Y-s, Guo Y-c. Design of integrated system for heterogeneous  
1231 network query terminal. *Journal of Computer Applications*. 2009; 29(8):2191-  
1232 2193.
- 1233 91. Bastian M, Heymann S, Jacomy M. Gephi: an open source software for  
1234 exploring and manipulating networks. In: *International AAAI Conference on*  
1235 *Weblogs and Social Media*. 2009.
- 1236 92. Smoot ME, Ono K, Ruscheinski J, Wang PL, Ideker T. Cytoscape 2.8: New  
1237 features for data integration and network visualization. *Bioinformatics*. 2011.
- 1238 93. Bader GD, Hogue CW. An automated method for finding molecular complexes  
1239 in large protein interaction networks. *BMC Bioinformatics*. 2003; 4(1):2.  
1240  
1241

1242 **Supplementary Figures**

1243

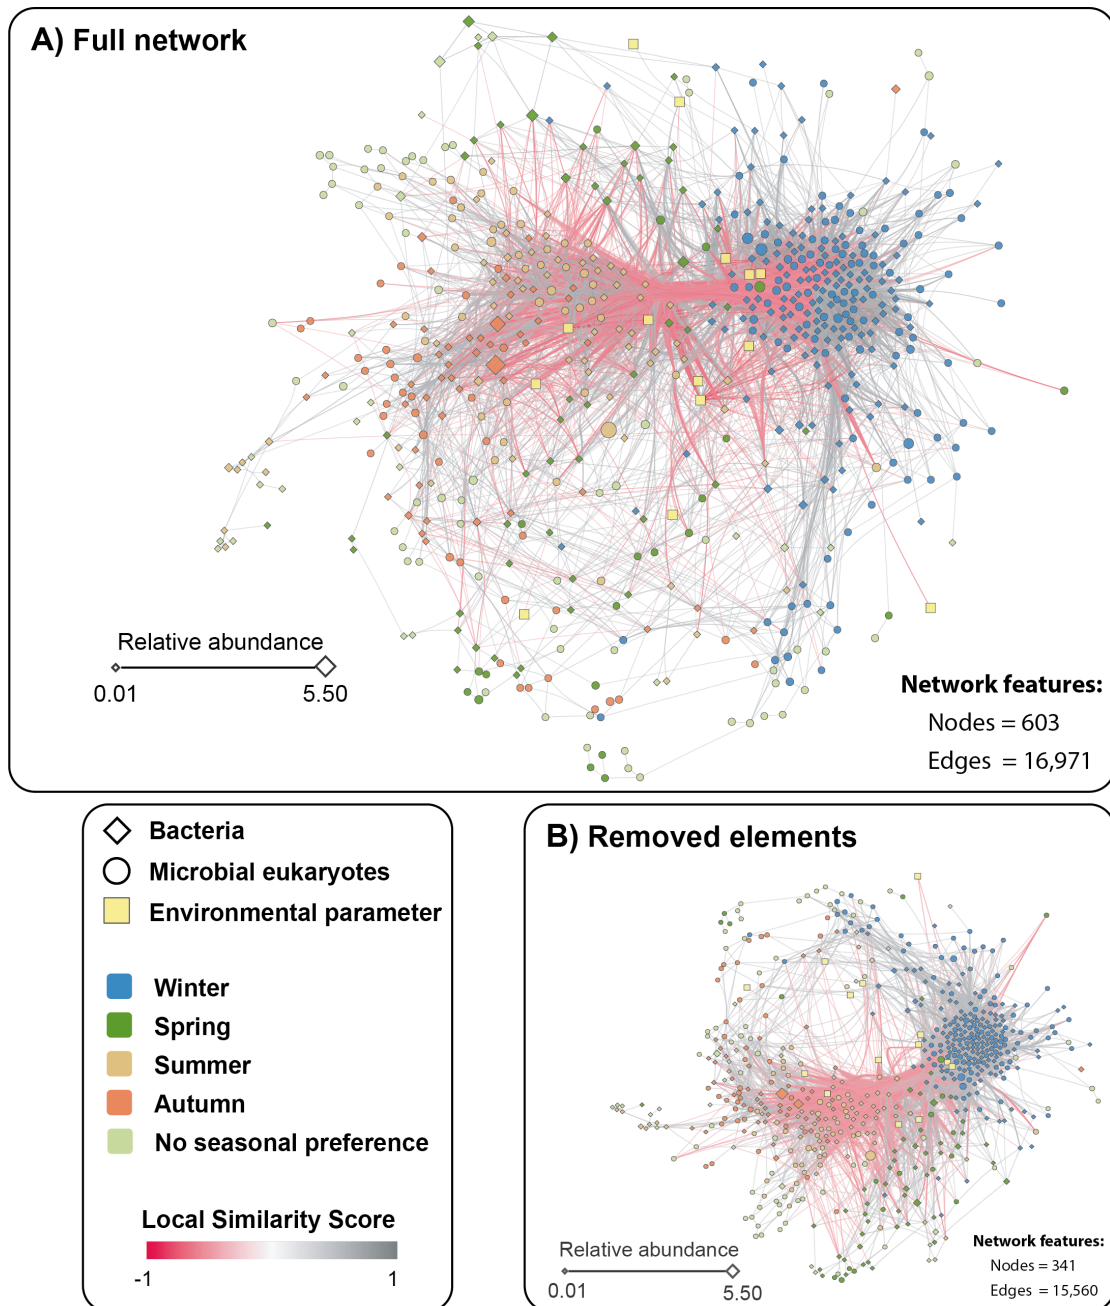

1244

1245

1246 **Supplementary Figure 1. Panel A** shows the full network constructed with the

1247 resident microbiota (that is, OTUs present in >30% of the samples over 10 years; Table

1248 1). **Panel B** displays network elements that were removed as they did not fulfill the cut-

1249 offs (that is, highly significant correlations ( $P$  &  $Q < 0.001$ ), local similarity scores  $> |0.7|$

1250 and Spearman correlations  $> |0.7|$ ).

1251

1252

1253

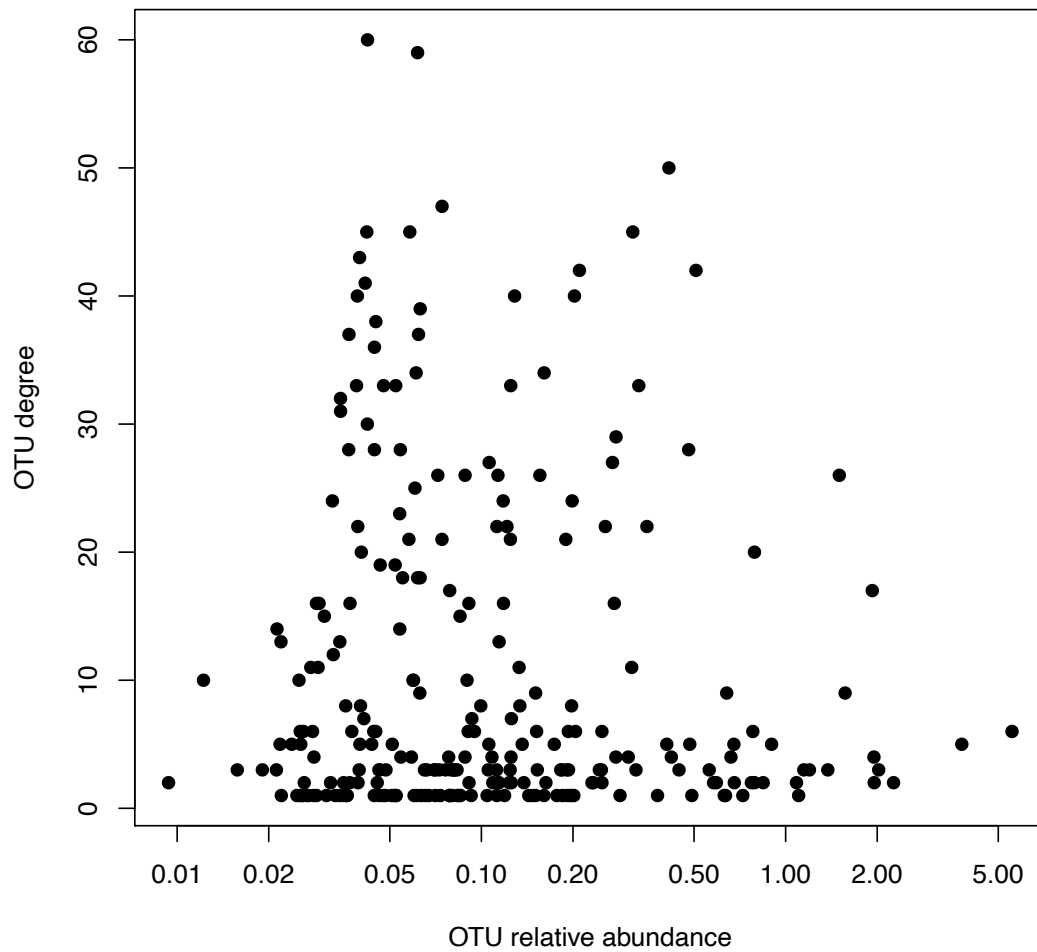

1254  
1255  
1256  
1257  
1258

**Supplementary Figure 2.** OTU relative abundance vs. degree shows no relationship in the core network.
